# Supplementary material for: Development of a core outcome set for lateral elbow tendinopathy (COS-LET) using best available evidence and an international consensus process
Source: HighWire-hosted journal article supplement (doi:10.1136/bjsports-2021-105044), 2022-02-08
Supplement: bjsports-2021-105044supp002_data_supplement.pdf [file bjsports-2021-105044supp002_data_supplement.pdf]

# Default Report

COS-LET\_Steering\_Committee\_OMERACT-filter2

January 10, 2021 5:43 PM MST

Q49 - Please leave your details here in case we need to follow up.

| Last name | First name |
|-----------|------------|
| val       | jones      |
| Phadnis   | Joideep    |
| Watts     | Adam       |
| Evans     | Jon        |
| Bisset    | Leanne     |
| Vicenzino | Bill       |
| Vuvan     | Viana      |
| Bateman   | Marcus     |

truth - The PRTEE meets the truth OMERACT filter requirements for the outcome

measure representing the Disability Domain in the core outcome set for lateral elbow tendinopathy.

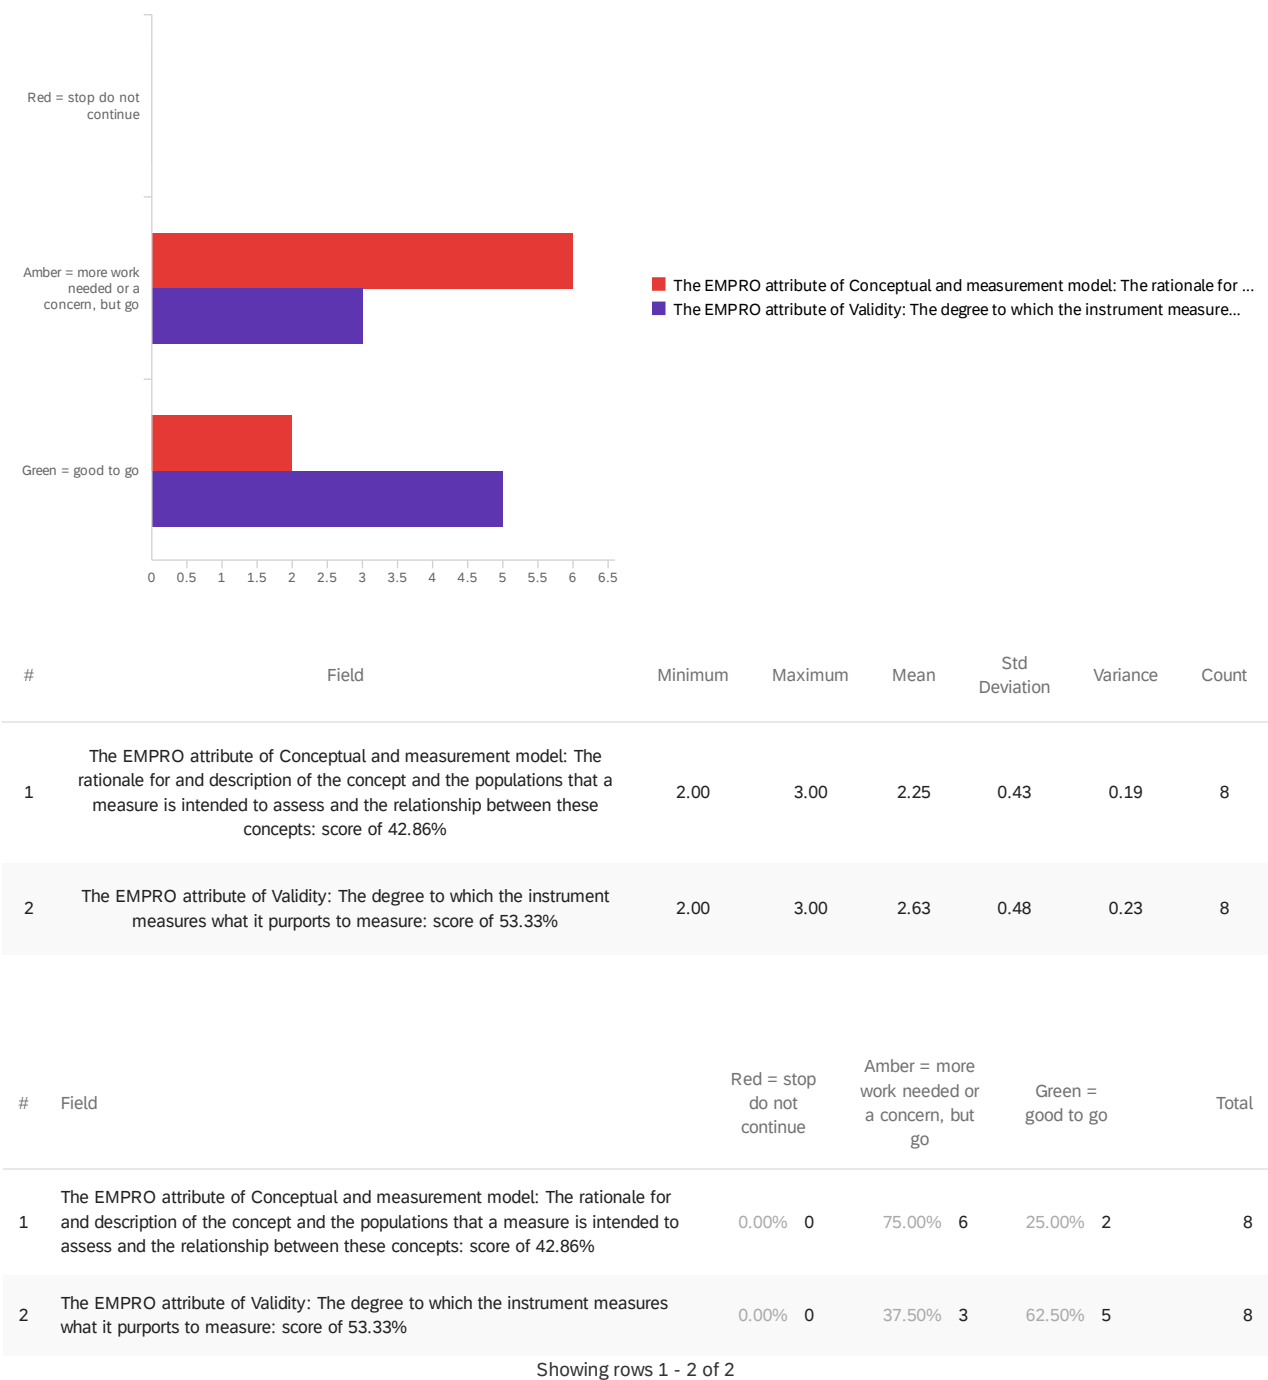

discrim - PRTEE meets the discrimination OMERACT filter requirements for the outcome

measure representing the Disability Domain in the core outcome set for lateral elbow

tendinopathy.

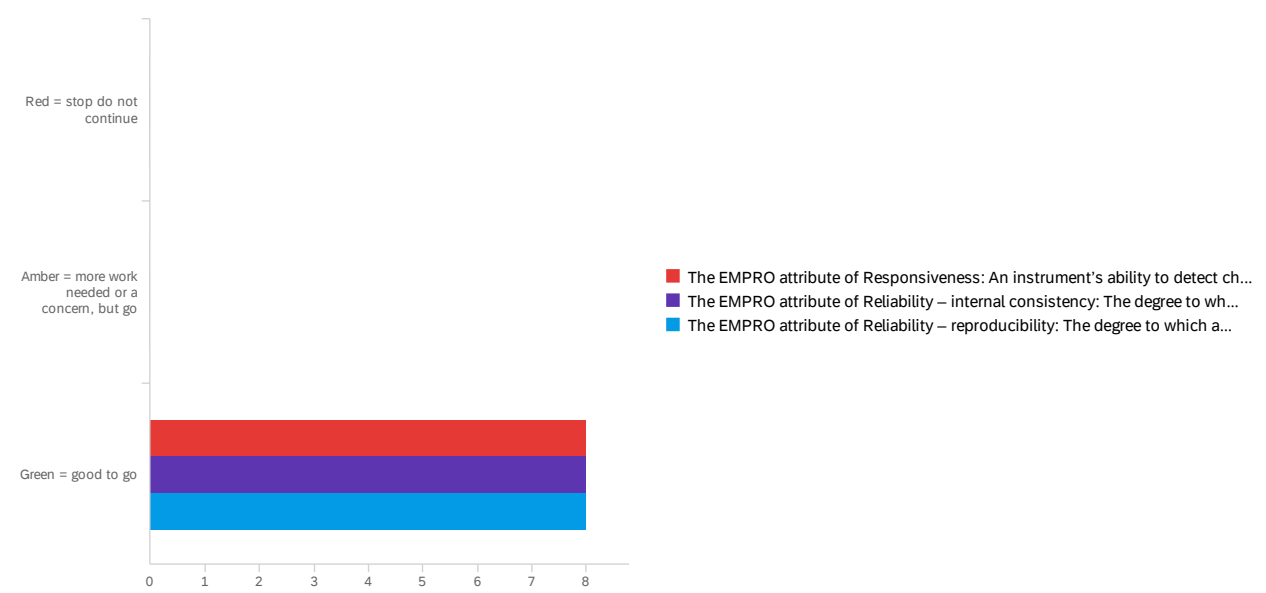

| # | Field                                                                                                                                   | Minimum | Maximum | Mean | Std<br>Deviation | Variance | Count |
|---|-----------------------------------------------------------------------------------------------------------------------------------------|---------|---------|------|------------------|----------|-------|
| 1 | The EMPRO attribute of Responsiveness: An instrument's ability to detect change over time: score of 77.78%                              | 3.00    | 3.00    | 3.00 | 0.00             | 0.00     | 8     |
| 2 | The EMPRO attribute of Reliability – internal consistency: The degree to which an instrument is free from random error: score of 66.67% | 3.00    | 3.00    | 3.00 | 0.00             | 0.00     | 8     |
| 3 | The EMPRO attribute of Reliability – reproducibility: The degree to which an instrument is free from random error: score of 66.67%      | 3.00    | 3.00    | 3.00 | 0.00             | 0.00     | 8     |

| # | Field                                                                                                                                   | Red = stop do not continue |   | Amber = more work needed or a concern, but go |   | Green = good to go |   | Total |
|---|-----------------------------------------------------------------------------------------------------------------------------------------|----------------------------|---|-----------------------------------------------|---|--------------------|---|-------|
| 1 | The EMPRO attribute of Responsiveness: An instrument's ability to detect change over time: score of 77.78%                              | 0.00%                      | 0 | 0.00%                                         | 0 | 100.00%            | 8 | 8     |
| 2 | The EMPRO attribute of Reliability – internal consistency: The degree to which an instrument is free from random error: score of 66.67% | 0.00%                      | 0 | 0.00%                                         | 0 | 100.00%            | 8 | 8     |

| # | Field                                                                                                                              | Red = stop do<br>not continue | Amber = more work<br>needed or a concern, but<br>go | Green =<br>good to go | Total |
|---|------------------------------------------------------------------------------------------------------------------------------------|-------------------------------|-----------------------------------------------------|-----------------------|-------|
| 3 | The EMPRO attribute of Reliability – reproducibility: The degree to which an instrument is free from random error: score of 66.67% | 0.00% 0                       | 0.00% 0                                             | 100.00% 8             | 8     |

Showing rows 1 - 3 of 3

overall - Considering your responses to the truth and discrimination OMERACT filter

above, does PRTEE meets the requirements for the outcome measure representing the

Disability Domain in the core outcome set for lateral elbow tendinopathy.

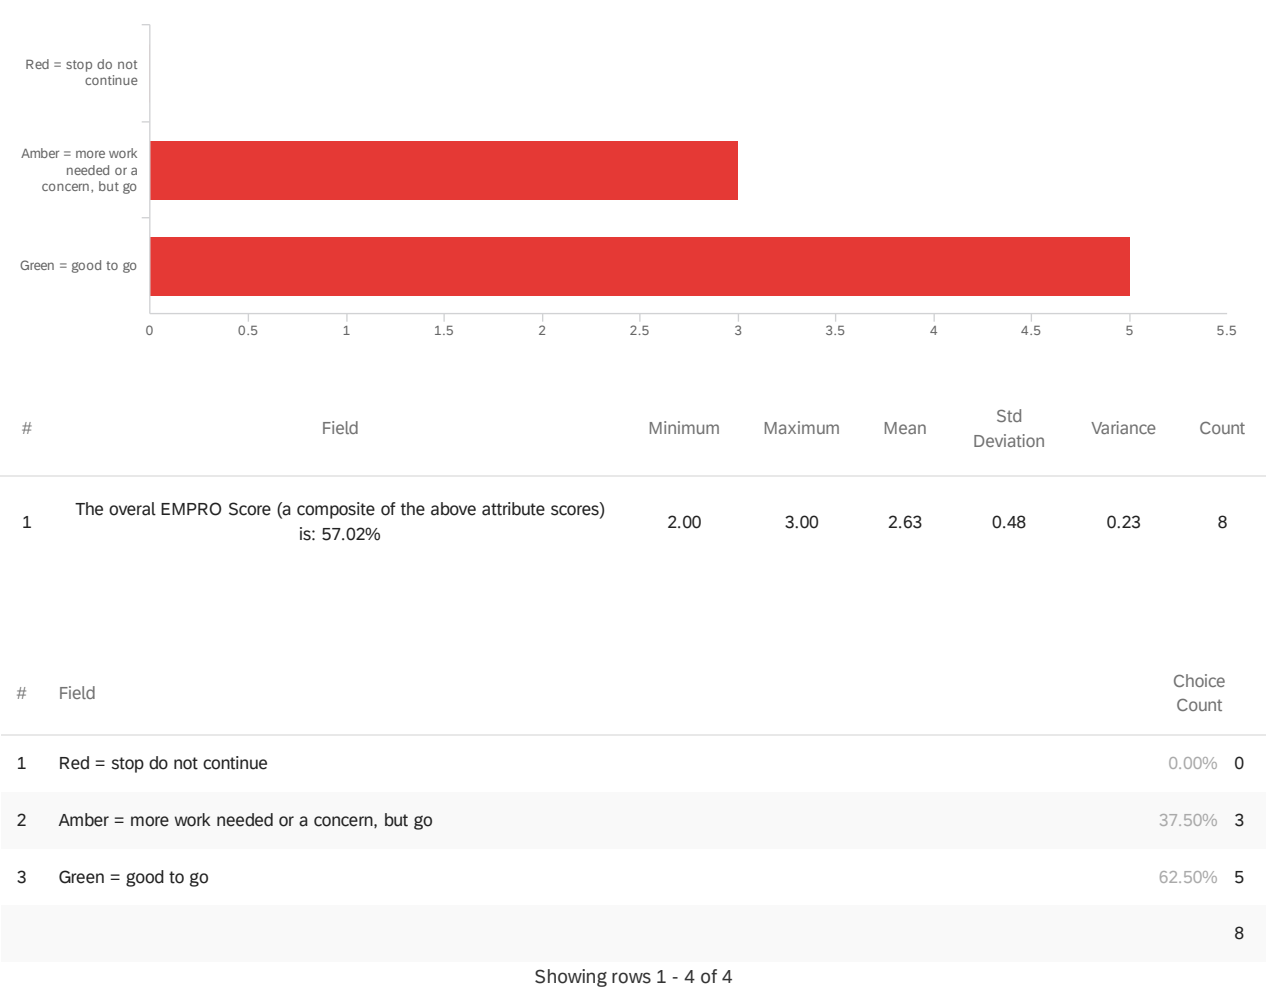

Q12 - The qDASH meets the truth OMERACT filter requirements for the outcome

measure representing the Disability Domain in the core outcome set for lateral elbow tendinopathy.

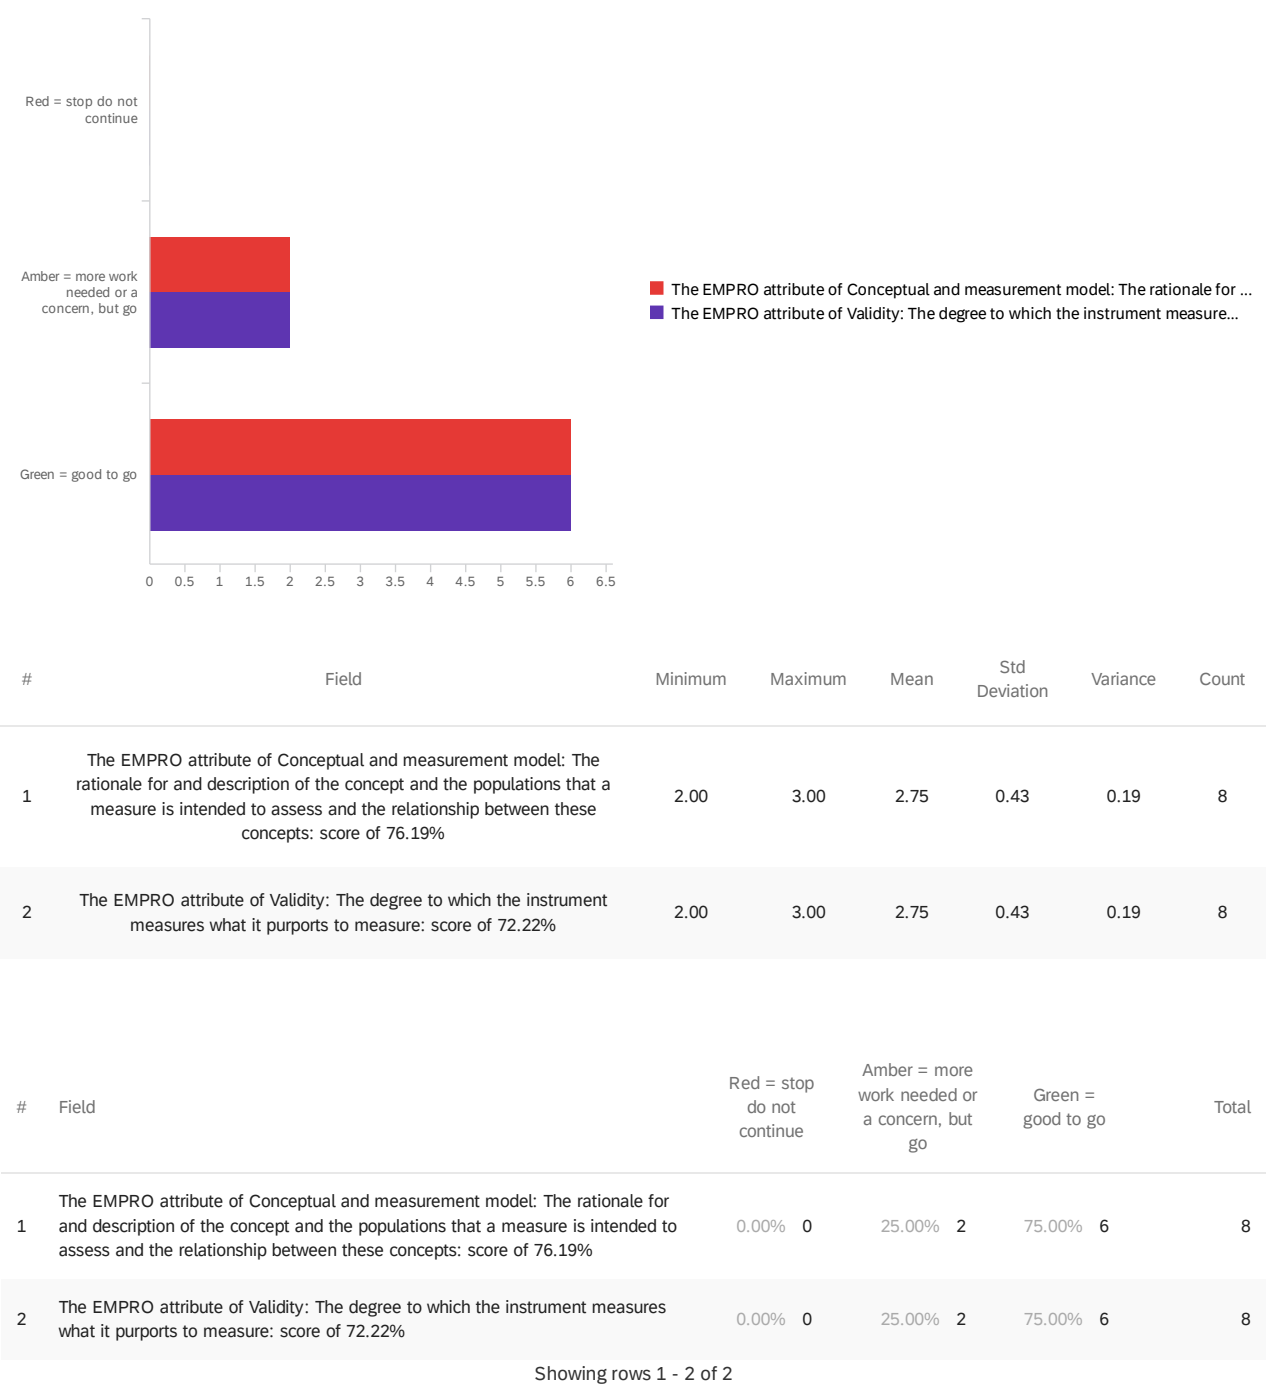

Q13 - qDASH meets the discrimination OMERACT filter requirements for the outcome measure representing the Disability Domain in the core outcome set for lateral elbow tendinopathy.

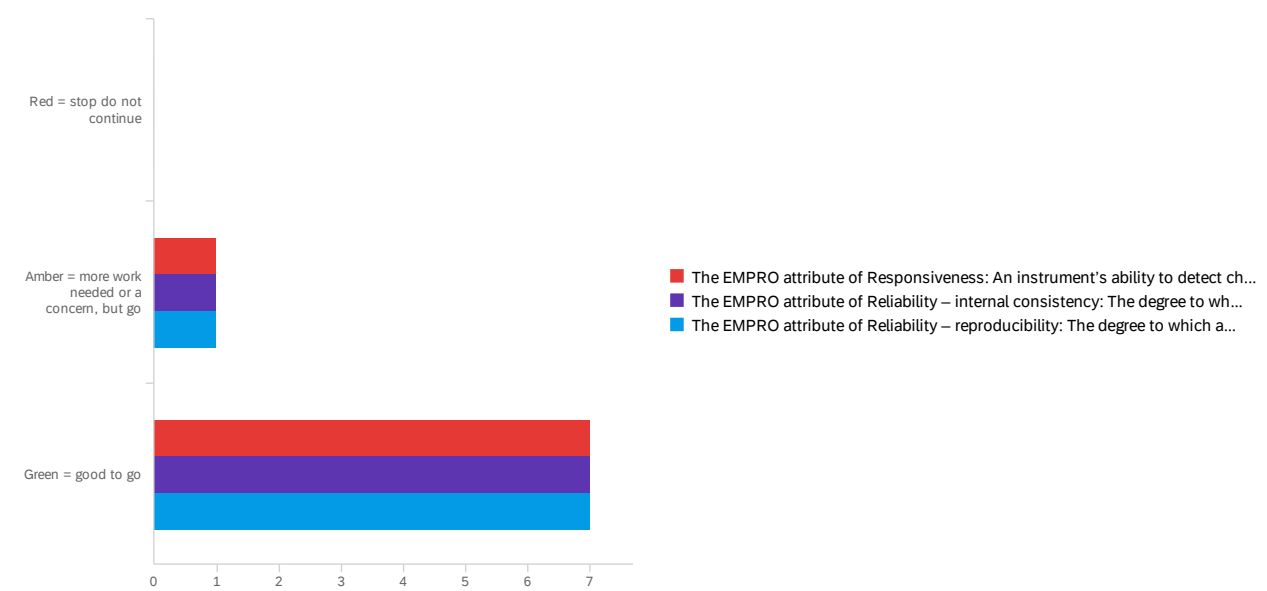

| # | Field                                                                                                                                   | Minimum | Maximum | Mean | Std Deviation | Variance | Count |
|---|-----------------------------------------------------------------------------------------------------------------------------------------|---------|---------|------|---------------|----------|-------|
| 1 | The EMPRO attribute of Responsiveness: An instrument's ability to detect change over time: score of 77.78%                              | 2.00    | 3.00    | 2.88 | 0.33          | 0.11     | 8     |
| 2 | The EMPRO attribute of Reliability – internal consistency: The degree to which an instrument is free from random error: score of 66.67% | 2.00    | 3.00    | 2.88 | 0.33          | 0.11     | 8     |
| 3 | The EMPRO attribute of Reliability – reproducibility: The degree to which an instrument is free from random error: score of 66.67%      | 2.00    | 3.00    | 2.88 | 0.33          | 0.11     | 8     |

| # | Field                                                                                                                                   | Red = stop do not continue |   | Amber = more work needed or a concern, but go |   | Green = good to go |   | Total |
|---|-----------------------------------------------------------------------------------------------------------------------------------------|----------------------------|---|-----------------------------------------------|---|--------------------|---|-------|
| 1 | The EMPRO attribute of Responsiveness: An instrument's ability to detect change over time: score of 77.78%                              | 0.00%                      | 0 | 12.50%                                        | 1 | 87.50%             | 7 | 8     |
| 2 | The EMPRO attribute of Reliability – internal consistency: The degree to which an instrument is free from random error: score of 66.67% | 0.00%                      | 0 | 12.50%                                        | 1 | 87.50%             | 7 | 8     |

| # | Field                                                                                                                              | Red = stop do<br>not continue | Amber = more work<br>needed or a concern, but<br>go | Green =<br>good to go | Total |
|---|------------------------------------------------------------------------------------------------------------------------------------|-------------------------------|-----------------------------------------------------|-----------------------|-------|
| 3 | The EMPRO attribute of Reliability – reproducibility: The degree to which an instrument is free from random error: score of 66.67% | 0.00% 0                       | 12.50% 1                                            | 87.50% 7              | 8     |

Showing rows 1 - 3 of 3



Q14 - Considering your responses to the truth and discrimination OMERACT filter above, does qDASH meets the requirements for the outcome measure representing the Disability Domain in the core outcome set for lateral elbow tendinopathy.

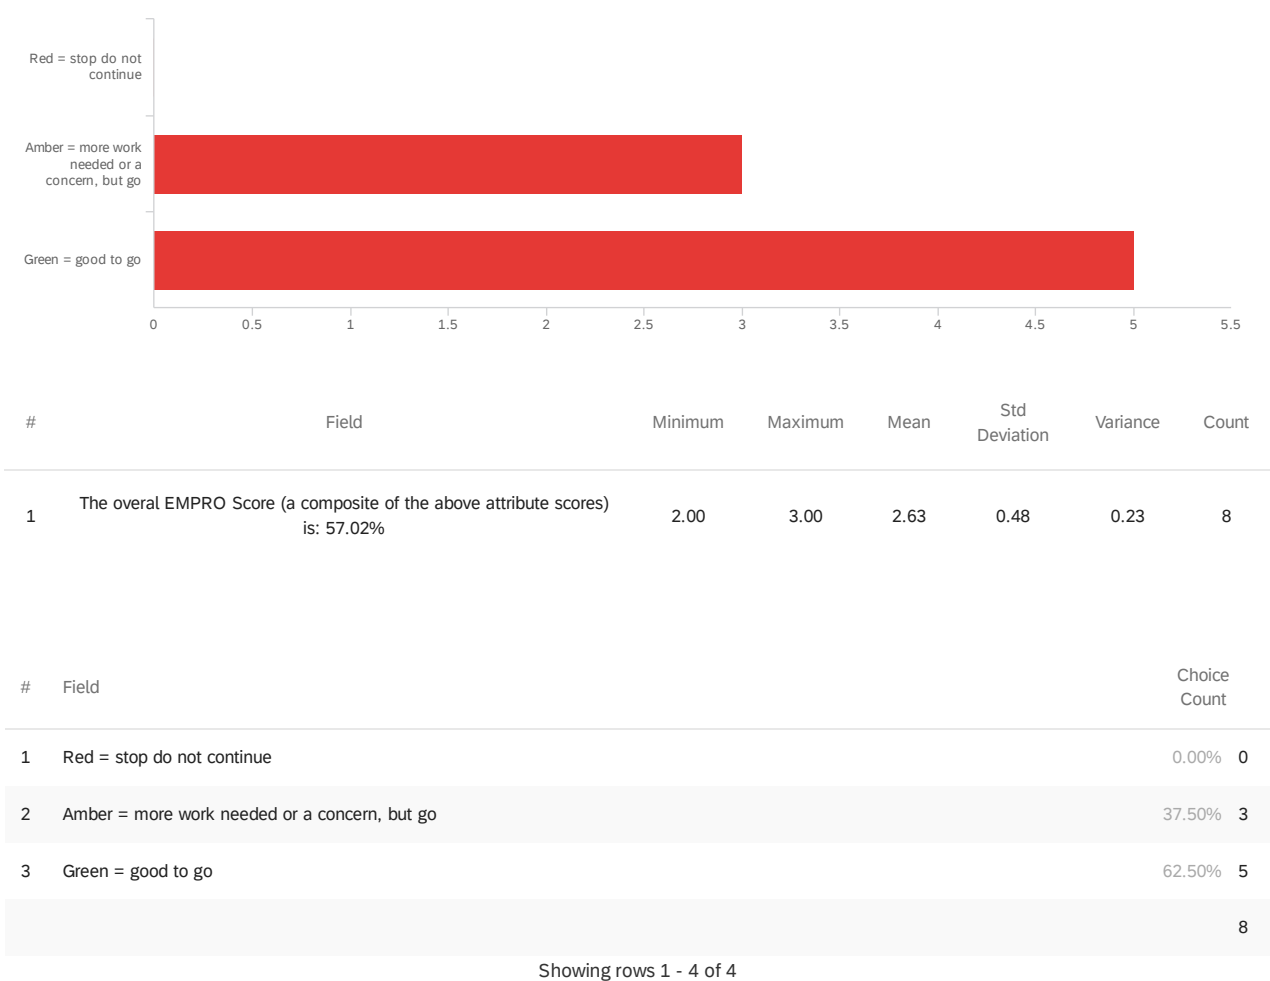

Q16 - The DASH meets the truth OMERACT filter requirements for the outcome measure

representing the Disability Domain in the core outcome set for lateral elbow tendinopathy.

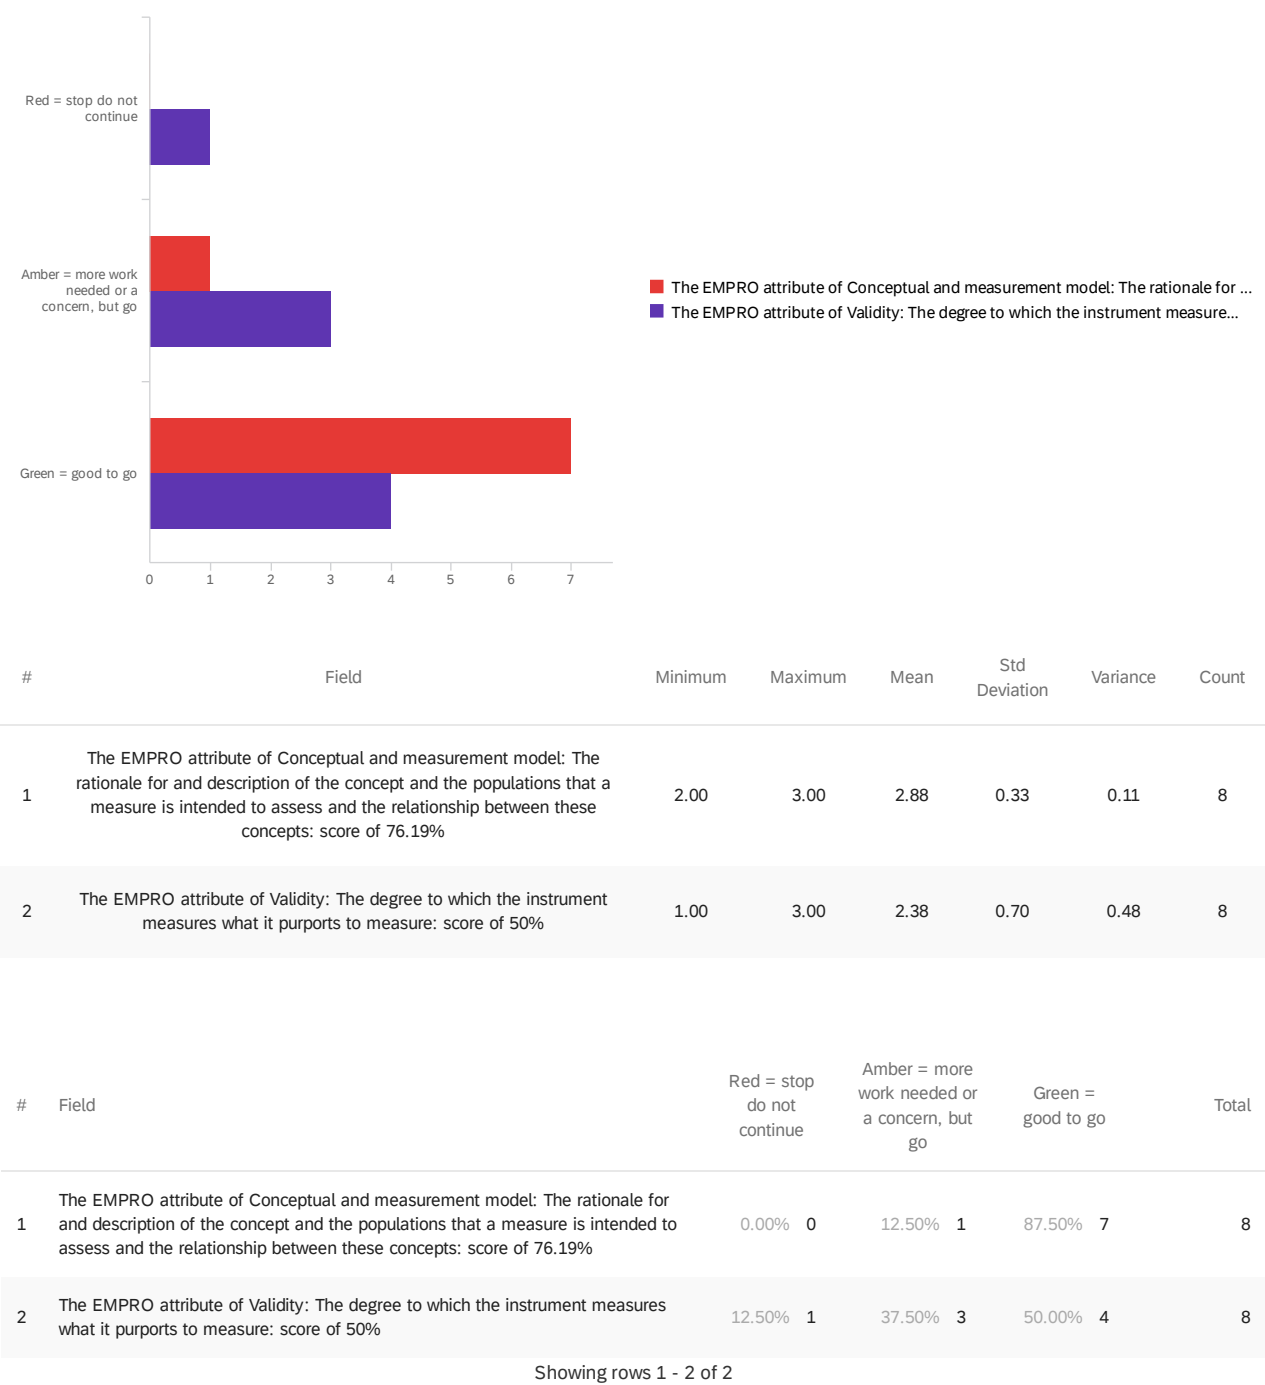

Q17 - DASH meets the discrimination OMERACT filter requirements for the outcome measure representing the Disability Domain in the core outcome set for lateral elbow tendinopathy.

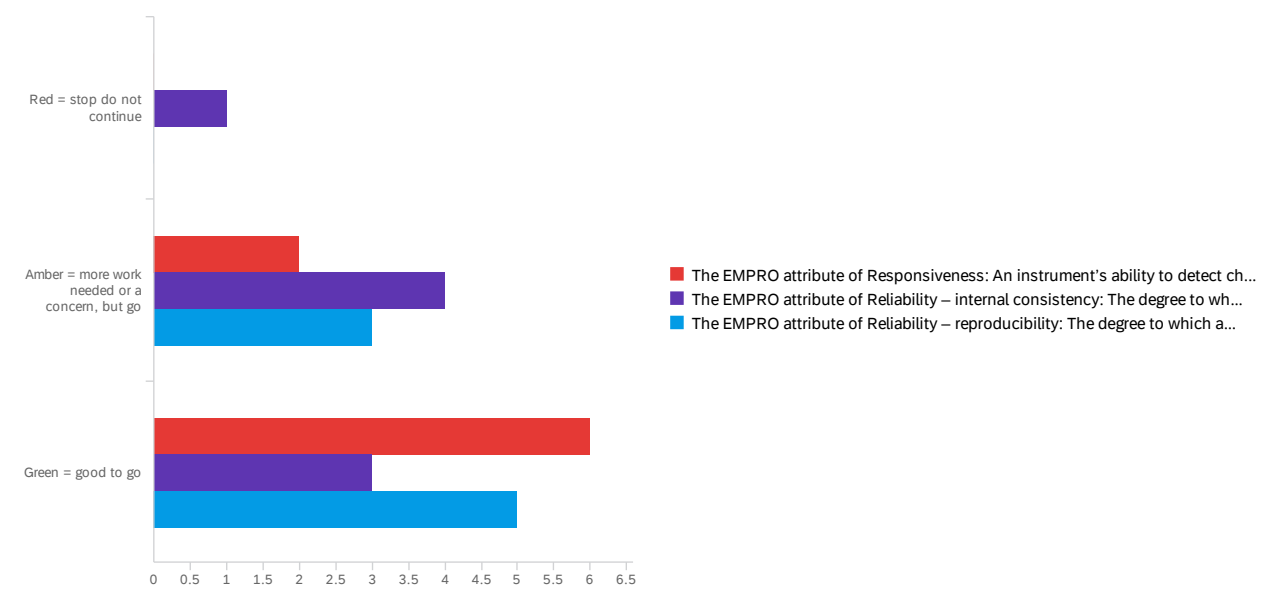

| # | Field                                                                                                                                | Minimum | Maximum | Mean | Std Deviation | Variance | Count |
|---|--------------------------------------------------------------------------------------------------------------------------------------|---------|---------|------|---------------|----------|-------|
| 1 | The EMPRO attribute of Responsiveness: An instrument's ability to detect change over time: score of 66.67%                           | 2.00    | 3.00    | 2.75 | 0.43          | 0.19     | 8     |
| 2 | The EMPRO attribute of Reliability – internal consistency: The degree to which an instrument is free from random error: score of 50% | 1.00    | 3.00    | 2.25 | 0.66          | 0.44     | 8     |
| 3 | The EMPRO attribute of Reliability – reproducibility: The degree to which an instrument is free from random error: score of 75%      | 2.00    | 3.00    | 2.63 | 0.48          | 0.23     | 8     |

| # | Field                                                                                                                                | Red = stop do not continue |   | Amber = more work needed or a concern, but go |   | Green = good to go |   | Total |
|---|--------------------------------------------------------------------------------------------------------------------------------------|----------------------------|---|-----------------------------------------------|---|--------------------|---|-------|
| 1 | The EMPRO attribute of Responsiveness: An instrument's ability to detect change over time: score of 66.67%                           | 0.00%                      | 0 | 25.00%                                        | 2 | 75.00%             | 6 | 8     |
| 2 | The EMPRO attribute of Reliability – internal consistency: The degree to which an instrument is free from random error: score of 50% | 12.50%                     | 1 | 50.00%                                        | 4 | 37.50%             | 3 | 8     |

| # | Field                                                                                                                           | Red = stop do<br>not continue | Amber = more work<br>needed or a concern, but<br>go | Green =<br>good to go | Total |
|---|---------------------------------------------------------------------------------------------------------------------------------|-------------------------------|-----------------------------------------------------|-----------------------|-------|
| 3 | The EMPRO attribute of Reliability – reproducibility: The degree to which an instrument is free from random error: score of 75% | 0.00% 0                       | 37.50% 3                                            | 62.50% 5              | 8     |

Showing rows 1 - 3 of 3

Q18 - Considering your responses to the truth and discrimination OMERACT filter above, does DASH meets the requirements for the outcome measure representing the Disability Domain in the core outcome set for lateral elbow tendinopathy.

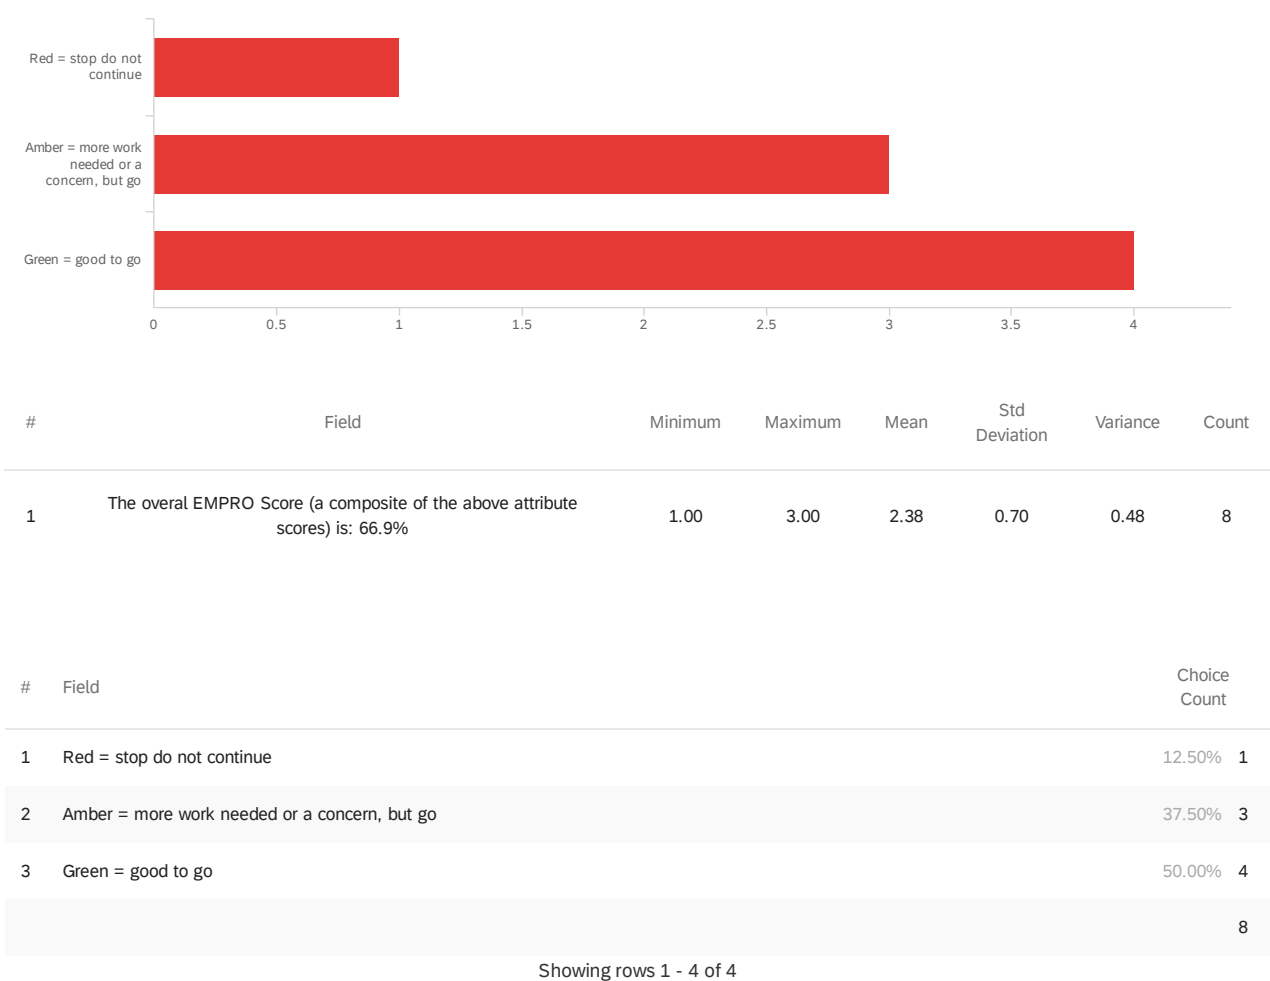

Q20 - The OES meets the truth OMERACT filter requirements for the outcome measure

representing the Disability Domain in the core outcome set for lateral elbow tendinopathy.

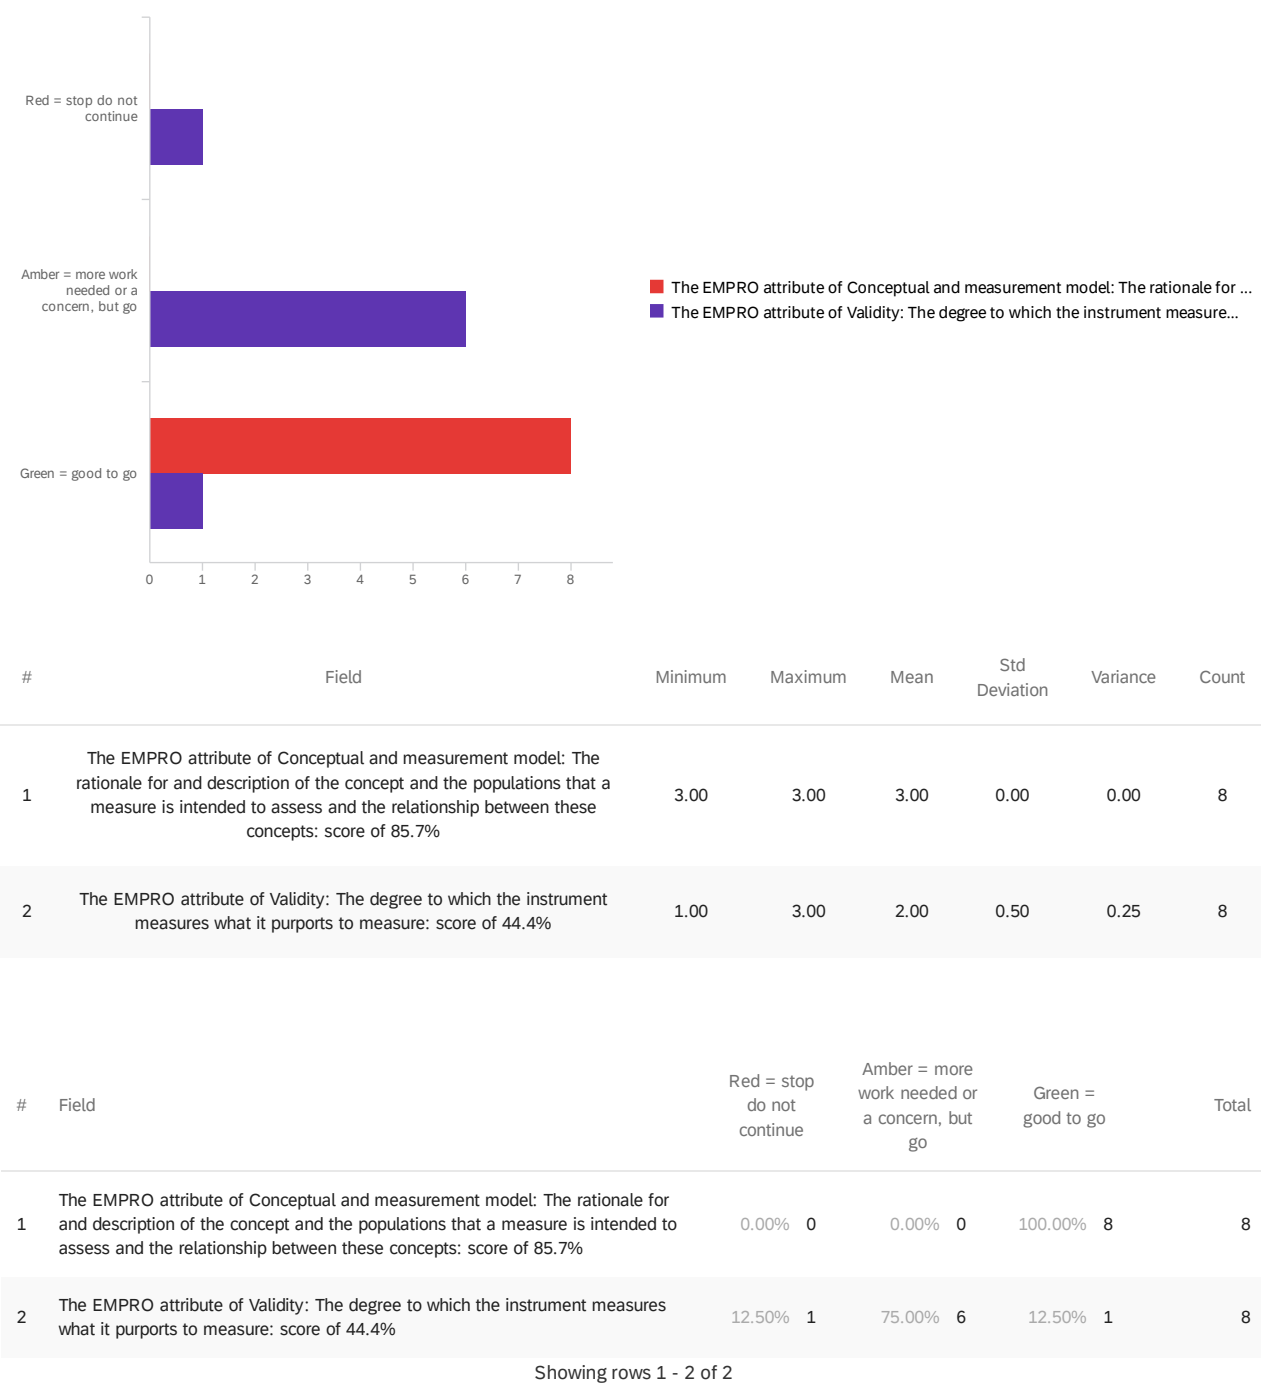

Q21 - OES meets the discrimination OMERACT filter requirements for the outcome

measure representing the Disability Domain in the core outcome set for lateral elbow tendinopathy.

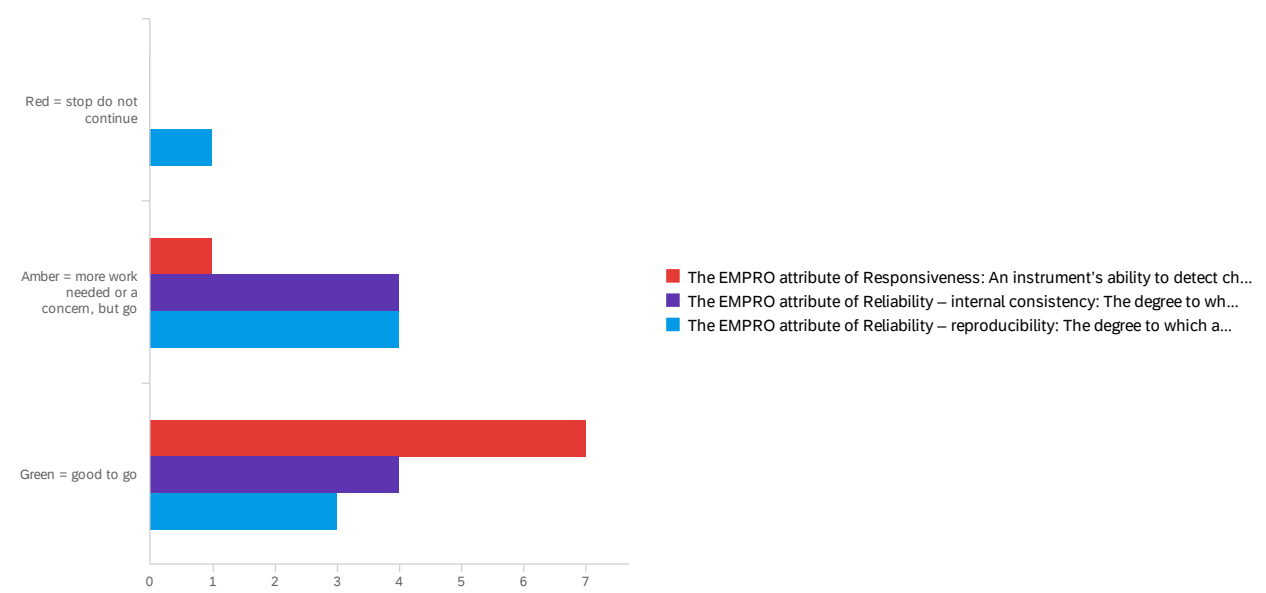

| # | Field                                                                                                                                  | Minimum | Maximum | Mean | Std Deviation | Variance | Count |
|---|----------------------------------------------------------------------------------------------------------------------------------------|---------|---------|------|---------------|----------|-------|
| 1 | The EMPRO attribute of Responsiveness: An instrument's ability to detect change over time: score of 77.8%                              | 2.00    | 3.00    | 2.88 | 0.33          | 0.11     | 8     |
| 2 | The EMPRO attribute of Reliability – internal consistency: The degree to which an instrument is free from random error: score of 58.3% | 2.00    | 3.00    | 2.50 | 0.50          | 0.25     | 8     |
| 3 | The EMPRO attribute of Reliability – reproducibility: The degree to which an instrument is free from random error: score of 50%        | 1.00    | 3.00    | 2.25 | 0.66          | 0.44     | 8     |

| # | Field                                                                                                                                  | Red = stop do not continue |   | Amber = more work needed or a concern, but go |   | Green = good to go |   | Total |
|---|----------------------------------------------------------------------------------------------------------------------------------------|----------------------------|---|-----------------------------------------------|---|--------------------|---|-------|
| 1 | The EMPRO attribute of Responsiveness: An instrument's ability to detect change over time: score of 77.8%                              | 0.00%                      | 0 | 12.50%                                        | 1 | 87.50%             | 7 | 8     |
| 2 | The EMPRO attribute of Reliability – internal consistency: The degree to which an instrument is free from random error: score of 58.3% | 0.00%                      | 0 | 50.00%                                        | 4 | 50.00%             | 4 | 8     |

| # | Field                                                                                                                           | Red = stop do<br>not continue | Amber = more work<br>needed or a concern, but<br>go | Green =<br>good to go | Total |
|---|---------------------------------------------------------------------------------------------------------------------------------|-------------------------------|-----------------------------------------------------|-----------------------|-------|
| 3 | The EMPRO attribute of Reliability – reproducibility: The degree to which an instrument is free from random error: score of 50% | 12.50% 1                      | 50.00% 4                                            | 37.50% 3              | 8     |

Showing rows 1 - 3 of 3



Q22 - Considering your responses to the truth and discrimination OMERACT filter above,

does OES meets the requirements for the outcome measure representing the Disability

Domain in the core outcome set for lateral elbow tendinopathy.

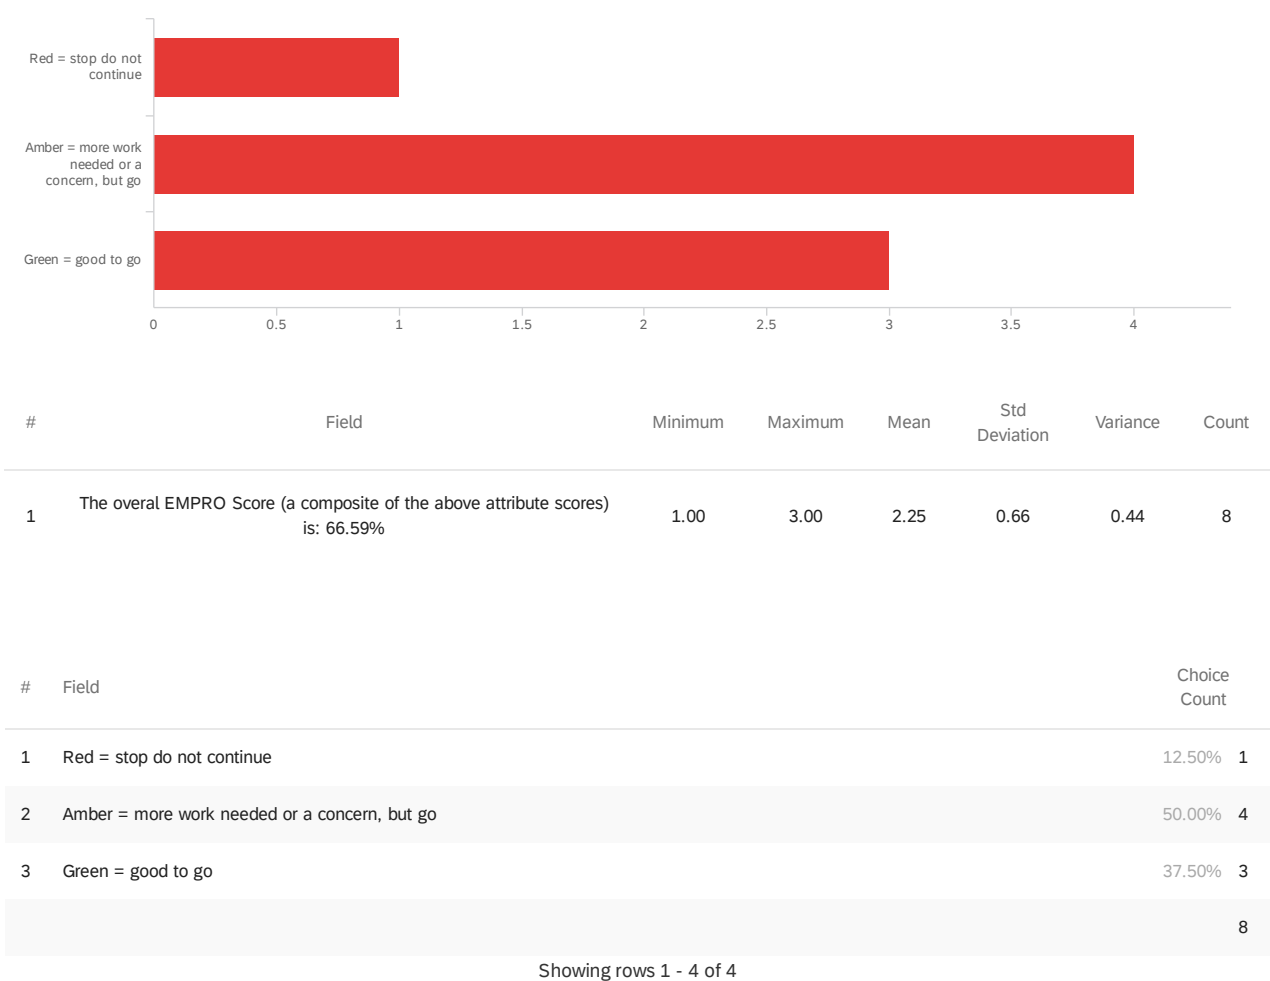

Q24 - The PRTEE meets the truth OMERACT filter requirements for the outcome

measure representing the Pain on Activity/Loading Domain in the core outcome set for lateral elbow tendinopathy.

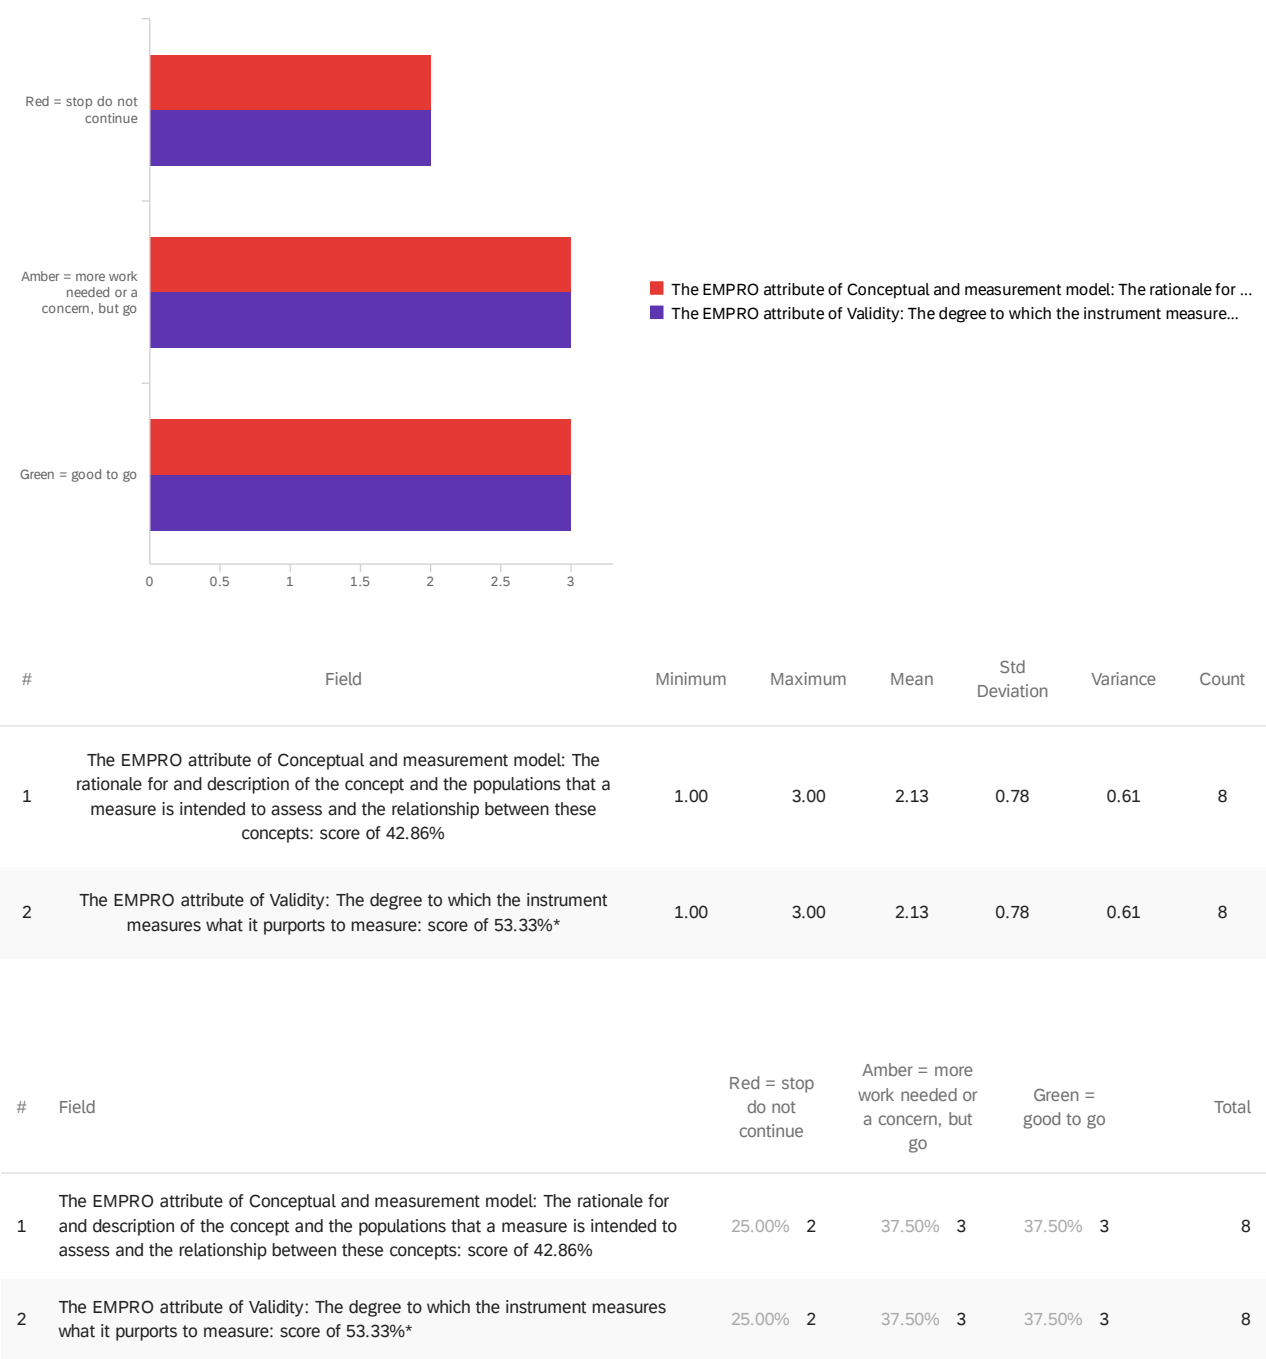

Showing rows 1 - 2 of 2

Q25 - PRTEE meets the discrimination OMERACT filter requirements for the outcome

measure representing the Pain on Activity/Loading Domain in the core outcome set for lateral elbow tendinopathy.

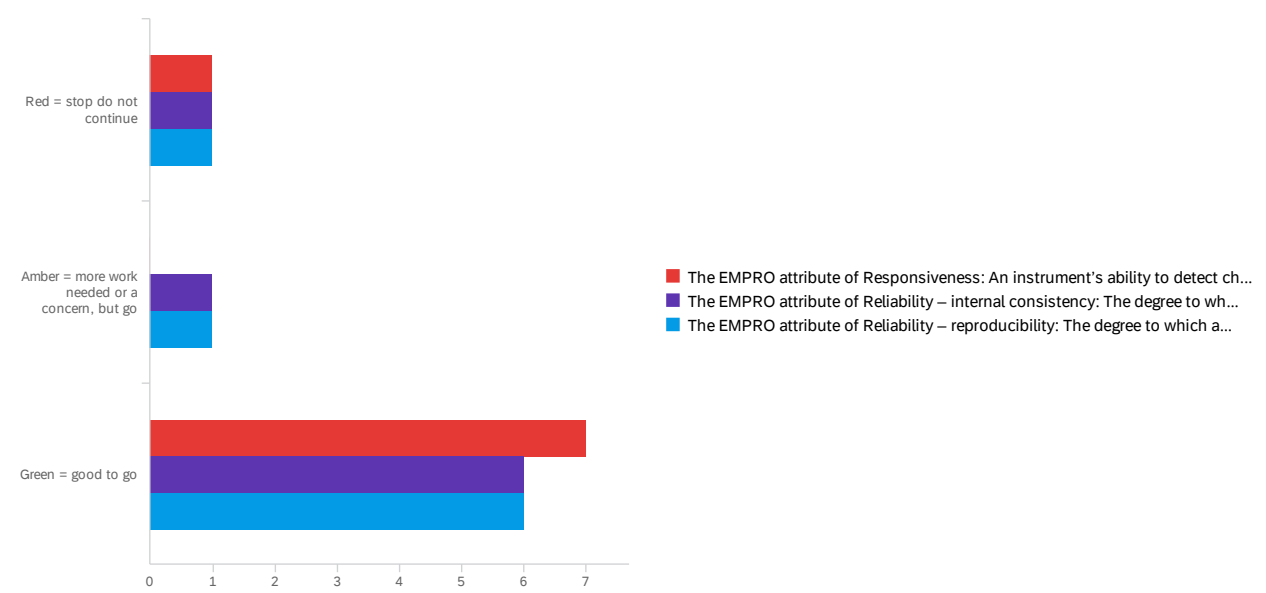

| # | Field                                                                                                                                   | Minimum | Maximum | Mean | Std Deviation | Variance | Count |
|---|-----------------------------------------------------------------------------------------------------------------------------------------|---------|---------|------|---------------|----------|-------|
| 1 | The EMPRO attribute of Responsiveness: An instrument's ability to detect change over time: score of 77.78%                              | 1.00    | 3.00    | 2.75 | 0.66          | 0.44     | 8     |
| 2 | The EMPRO attribute of Reliability – internal consistency: The degree to which an instrument is free from random error: score of 66.67% | 1.00    | 3.00    | 2.63 | 0.70          | 0.48     | 8     |
| 3 | The EMPRO attribute of Reliability – reproducibility: The degree to which an instrument is free from random error: score of 66.67%      | 1.00    | 3.00    | 2.63 | 0.70          | 0.48     | 8     |

| # | Field                                                                                                                                   | Red = stop do not continue |   | Amber = more work needed or a concern, but go |   | Green = good to go |   | Total |
|---|-----------------------------------------------------------------------------------------------------------------------------------------|----------------------------|---|-----------------------------------------------|---|--------------------|---|-------|
| 1 | The EMPRO attribute of Responsiveness: An instrument's ability to detect change over time: score of 77.78%                              | 12.50%                     | 1 | 0.00%                                         | 0 | 87.50%             | 7 | 8     |
| 2 | The EMPRO attribute of Reliability – internal consistency: The degree to which an instrument is free from random error: score of 66.67% | 12.50%                     | 1 | 12.50%                                        | 1 | 75.00%             | 6 | 8     |

| # | Field                                                                                                                              | Red = stop do<br>not continue | Amber = more work<br>needed or a concern, but<br>go | Green =<br>good to go | Total |
|---|------------------------------------------------------------------------------------------------------------------------------------|-------------------------------|-----------------------------------------------------|-----------------------|-------|
| 3 | The EMPRO attribute of Reliability – reproducibility: The degree to which an instrument is free from random error: score of 66.67% | 12.50% 1                      | 12.50% 1                                            | 75.00% 6              | 8     |

Showing rows 1 - 3 of 3

Q26 - Considering your responses to the truth and discrimination OMERACT filter above and the fact that the EMPRO scores will overinflate the validity and overall score due to the lack of validity data for the pain subscale, does PRTEE meets the requirements for the outcome measure representing the Pain on Activity/Loading Domain in the core outcome set for lateral elbow tendinopathy.

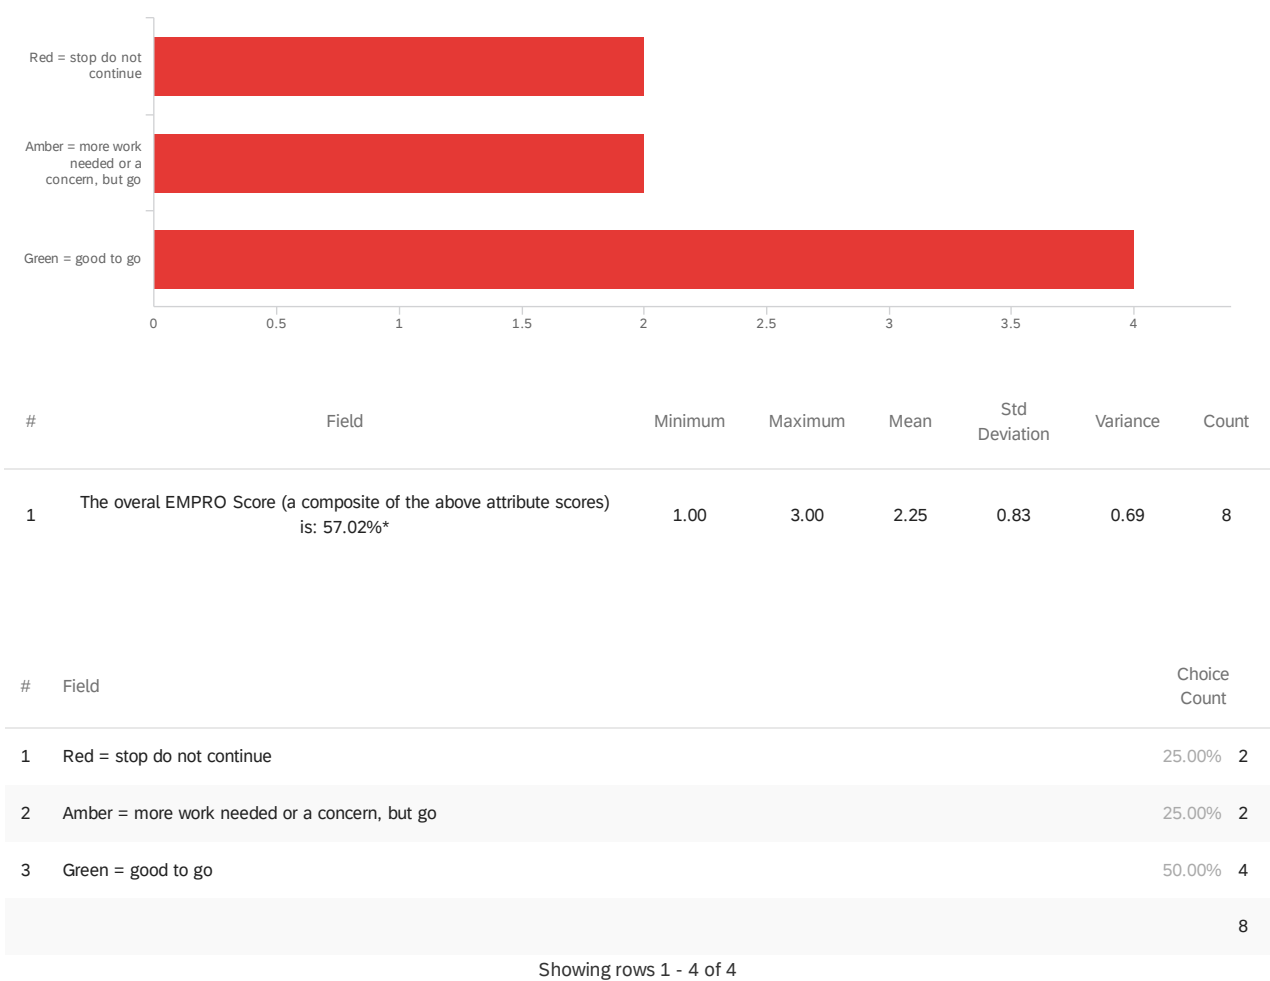

Q28 - The TEFS meets the truth OMERACT filter requirements for the outcome measure

representing the Pain on Activity/Loading Domain in the core outcome set for lateral elbow tendinopathy.

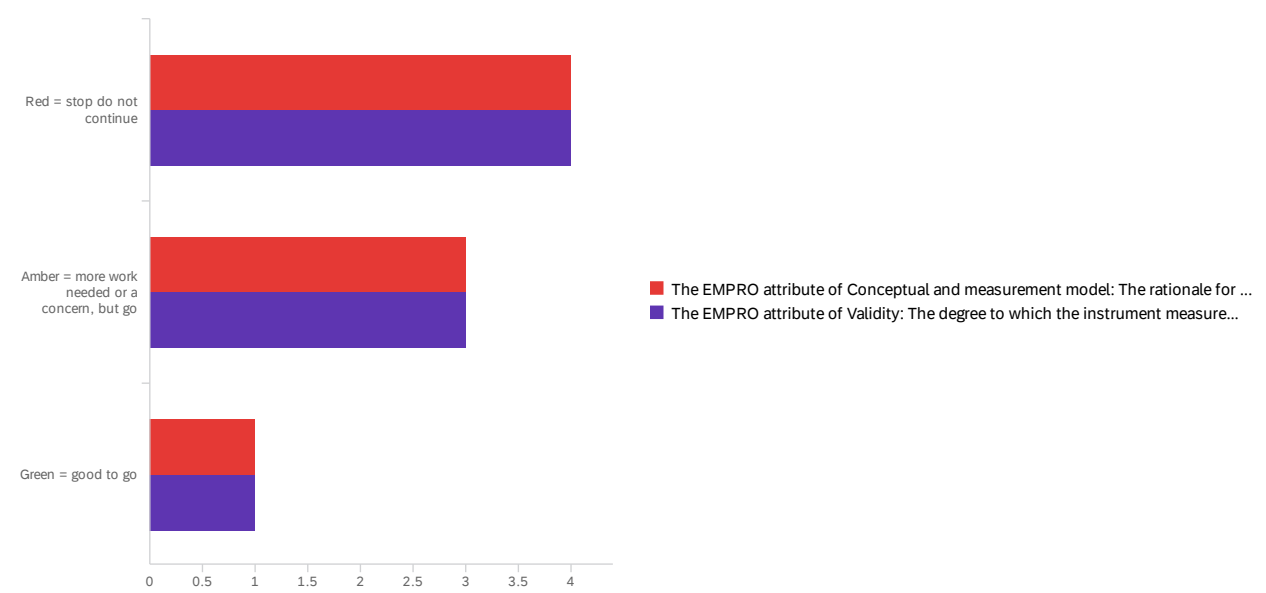

| # | Field                                                                                                                                                                                                                          | Minimum | Maximum | Mean | Std Deviation | Variance | Count |
|---|--------------------------------------------------------------------------------------------------------------------------------------------------------------------------------------------------------------------------------|---------|---------|------|---------------|----------|-------|
| 1 | The EMPRO attribute of Conceptual and measurement model: The rationale for and description of the concept and the populations that a measure is intended to assess and the relationship between these concepts: score of 33.3% | 1.00    | 3.00    | 1.63 | 0.70          | 0.48     | 8     |
| 2 | The EMPRO attribute of Validity: The degree to which the instrument measures what it purports to measure: score of 33.3%                                                                                                       | 1.00    | 3.00    | 1.63 | 0.70          | 0.48     | 8     |

| # | Field                                                                                                                                                                                                                          | Red = stop do not continue |   | Amber = more work needed or a concern, but go |   | Green = good to go |   | Total |
|---|--------------------------------------------------------------------------------------------------------------------------------------------------------------------------------------------------------------------------------|----------------------------|---|-----------------------------------------------|---|--------------------|---|-------|
| 1 | The EMPRO attribute of Conceptual and measurement model: The rationale for and description of the concept and the populations that a measure is intended to assess and the relationship between these concepts: score of 33.3% | 50.00%                     | 4 | 37.50%                                        | 3 | 12.50%             | 1 | 8     |
| 2 | The EMPRO attribute of Validity: The degree to which the instrument measures what it purports to measure: score of 33.3%                                                                                                       | 50.00%                     | 4 | 37.50%                                        | 3 | 12.50%             | 1 | 8     |

Showing rows 1 - 2 of 2

Q29 - TEFS meets the discrimination OMERACT filter requirements for the outcome

measure representing the Pain on Activity/Loading Domain in the core outcome set for lateral elbow tendinopathy.

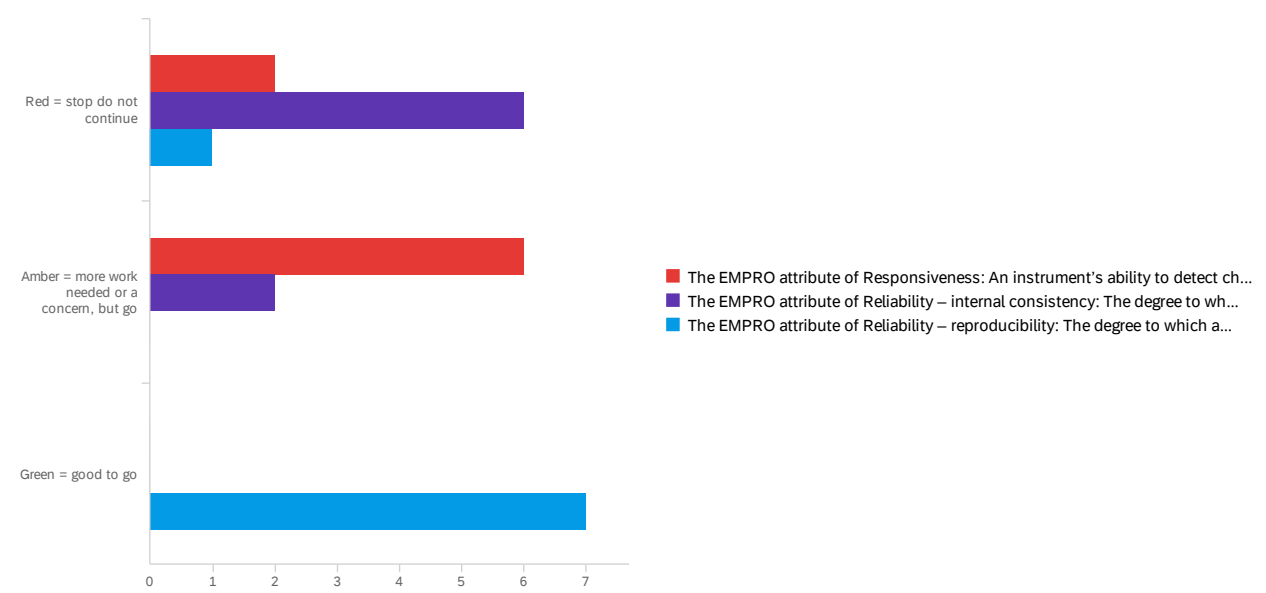

| # | Field                                                                                                                                 | Minimum | Maximum | Mean | Std Deviation | Variance | Count |
|---|---------------------------------------------------------------------------------------------------------------------------------------|---------|---------|------|---------------|----------|-------|
| 1 | The EMPRO attribute of Responsiveness: An instrument's ability to detect change over time: score of 44.4%                             | 1.00    | 2.00    | 1.75 | 0.43          | 0.19     | 8     |
| 2 | The EMPRO attribute of Reliability – internal consistency: The degree to which an instrument is free from random error: score of 8.3% | 1.00    | 2.00    | 1.25 | 0.43          | 0.19     | 8     |
| 3 | The EMPRO attribute of Reliability – reproducibility: The degree to which an instrument is free from random error: score of 75%       | 1.00    | 3.00    | 2.75 | 0.66          | 0.44     | 8     |

| # | Field                                                                                                                                 | Red = stop do not continue |   | Amber = more work needed or a concern, but go |   | Green = good to go |   | Total |
|---|---------------------------------------------------------------------------------------------------------------------------------------|----------------------------|---|-----------------------------------------------|---|--------------------|---|-------|
| 1 | The EMPRO attribute of Responsiveness: An instrument's ability to detect change over time: score of 44.4%                             | 25.00%                     | 2 | 75.00%                                        | 6 | 0.00%              | 0 | 8     |
| 2 | The EMPRO attribute of Reliability – internal consistency: The degree to which an instrument is free from random error: score of 8.3% | 75.00%                     | 6 | 25.00%                                        | 2 | 0.00%              | 0 | 8     |

| # | Field                                                                                                                           | Red = stop do<br>not continue | Amber = more work<br>needed or a concern, but<br>go | Green =<br>good to go | Total |
|---|---------------------------------------------------------------------------------------------------------------------------------|-------------------------------|-----------------------------------------------------|-----------------------|-------|
| 3 | The EMPRO attribute of Reliability – reproducibility: The degree to which an instrument is free from random error: score of 75% | 12.50% 1                      | 0.00% 0                                             | 87.50% 7              | 8     |

Showing rows 1 - 3 of 3



Q30 - Considering your responses to the truth and discrimination OMERACT filter above,

does TEFS meet the requirements for the outcome measure representing the Pain on

Activity/Loading Domain in the core outcome set for lateral elbow tendinopathy.

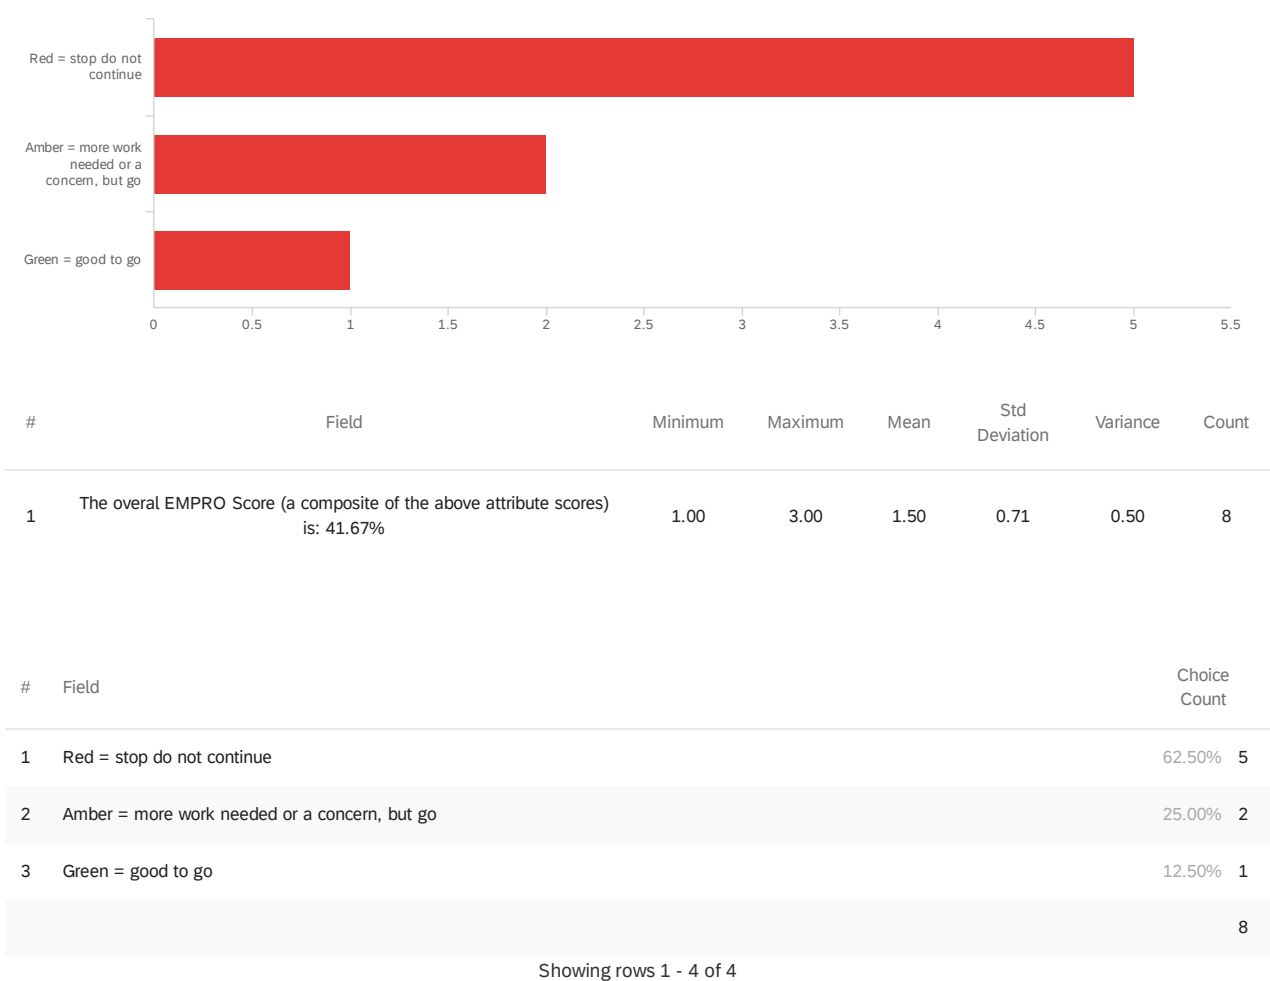

Q36 - The TEFS meets the truth OMERACT filter requirements for the outcome measure

representing the Pain over a Specified Time Domain in the core outcome set for lateral elbow tendinopathy.

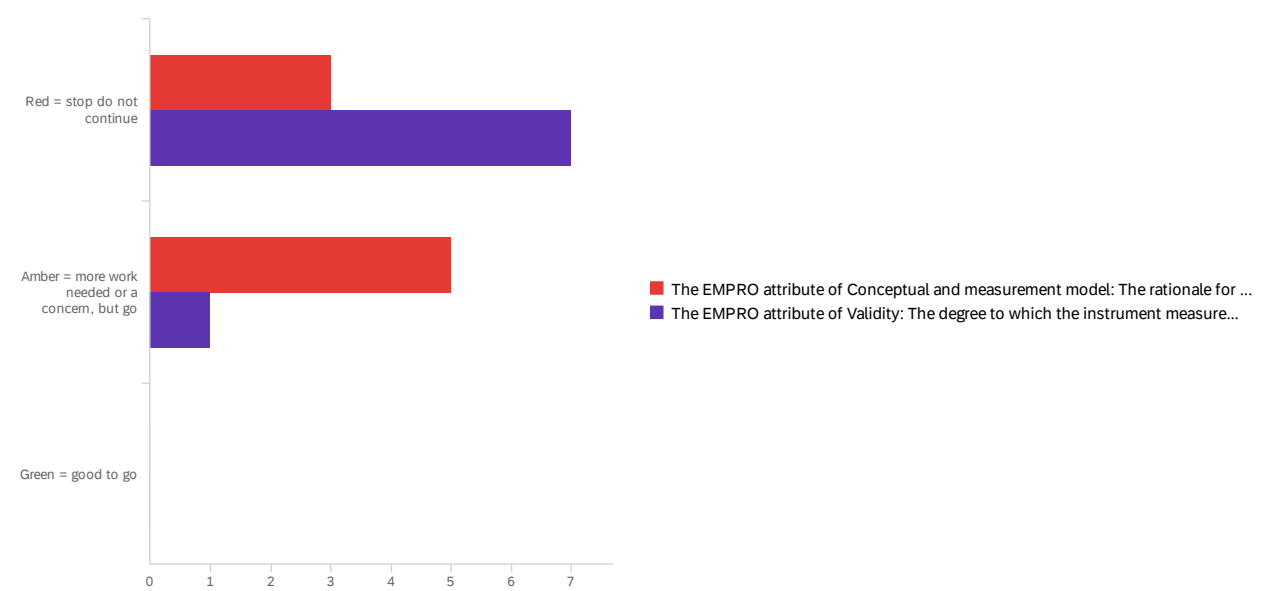

| # | Field                                                                                                                                                                                                                          | Minimum | Maximum | Mean | Std Deviation | Variance | Count |
|---|--------------------------------------------------------------------------------------------------------------------------------------------------------------------------------------------------------------------------------|---------|---------|------|---------------|----------|-------|
| 1 | The EMPRO attribute of Conceptual and measurement model: The rationale for and description of the concept and the populations that a measure is intended to assess and the relationship between these concepts: score of 33.3% | 1.00    | 2.00    | 1.63 | 0.48          | 0.23     | 8     |
| 2 | The EMPRO attribute of Validity: The degree to which the instrument measures what it purports to measure: score of 33.3%                                                                                                       | 1.00    | 2.00    | 1.13 | 0.33          | 0.11     | 8     |

| # | Field                                                                                                                                                                                                                          | Red = stop do not continue |   | Amber = more work needed or a concern, but go |   | Green = good to go |   | Total |
|---|--------------------------------------------------------------------------------------------------------------------------------------------------------------------------------------------------------------------------------|----------------------------|---|-----------------------------------------------|---|--------------------|---|-------|
| 1 | The EMPRO attribute of Conceptual and measurement model: The rationale for and description of the concept and the populations that a measure is intended to assess and the relationship between these concepts: score of 33.3% | 37.50%                     | 3 | 62.50%                                        | 5 | 0.00%              | 0 | 8     |
| 2 | The EMPRO attribute of Validity: The degree to which the instrument measures what it purports to measure: score of 33.3%                                                                                                       | 87.50%                     | 7 | 12.50%                                        | 1 | 0.00%              | 0 | 8     |

Showing rows 1 - 2 of 2

Q37 - TEFS meets the discrimination OMERACT filter requirements for the outcome

measure representing the Pain over a Specified Time Domain in the core outcome set for lateral elbow tendinopathy.

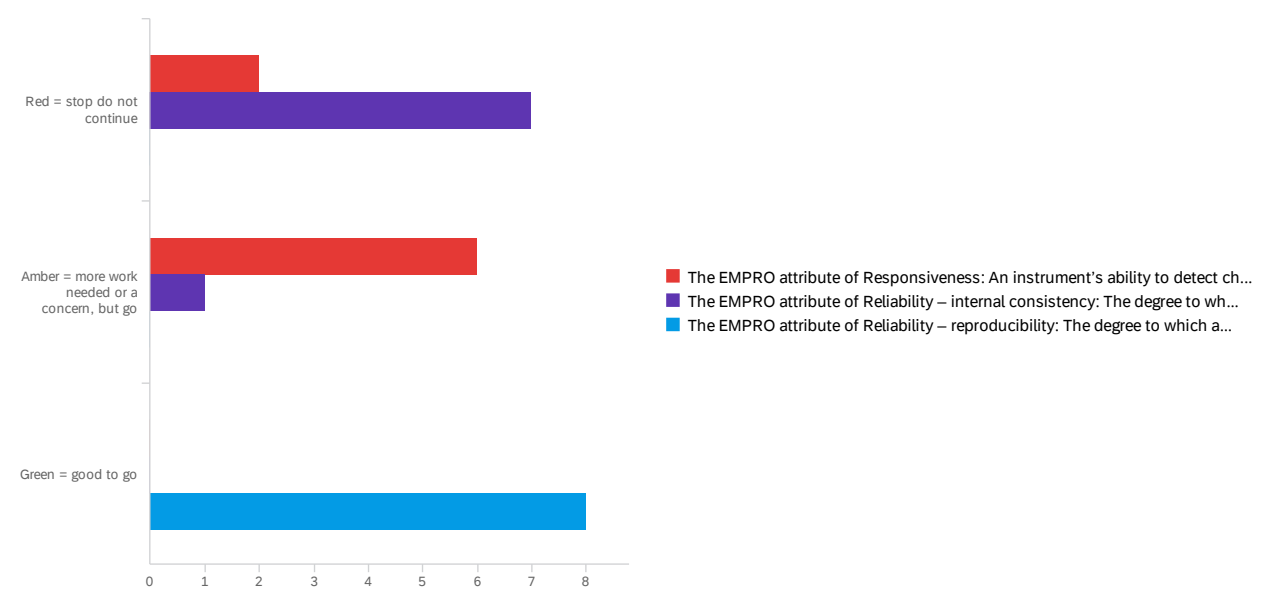

| # | Field                                                                                                                                 | Minimum | Maximum | Mean | Std Deviation | Variance | Count |
|---|---------------------------------------------------------------------------------------------------------------------------------------|---------|---------|------|---------------|----------|-------|
| 1 | The EMPRO attribute of Responsiveness: An instrument's ability to detect change over time: score of 44.4%                             | 1.00    | 2.00    | 1.75 | 0.43          | 0.19     | 8     |
| 2 | The EMPRO attribute of Reliability – internal consistency: The degree to which an instrument is free from random error: score of 8.3% | 1.00    | 2.00    | 1.13 | 0.33          | 0.11     | 8     |
| 3 | The EMPRO attribute of Reliability – reproducibility: The degree to which an instrument is free from random error: score of 75%       | 3.00    | 3.00    | 3.00 | 0.00          | 0.00     | 8     |

| # | Field                                                                                                                                 | Red = stop do not continue |   | Amber = more work needed or a concern, but go |   | Green = good to go |   | Total |
|---|---------------------------------------------------------------------------------------------------------------------------------------|----------------------------|---|-----------------------------------------------|---|--------------------|---|-------|
| 1 | The EMPRO attribute of Responsiveness: An instrument's ability to detect change over time: score of 44.4%                             | 25.00%                     | 2 | 75.00%                                        | 6 | 0.00%              | 0 | 8     |
| 2 | The EMPRO attribute of Reliability – internal consistency: The degree to which an instrument is free from random error: score of 8.3% | 87.50%                     | 7 | 12.50%                                        | 1 | 0.00%              | 0 | 8     |

| # | Field                                                                                                                           | Red = stop do<br>not continue | Amber = more work<br>needed or a concern, but<br>go | Green =<br>good to go | Total |
|---|---------------------------------------------------------------------------------------------------------------------------------|-------------------------------|-----------------------------------------------------|-----------------------|-------|
| 3 | The EMPRO attribute of Reliability – reproducibility: The degree to which an instrument is free from random error: score of 75% | 0.00% 0                       | 0.00% 0                                             | 100.00% 8             | 8     |

Showing rows 1 - 3 of 3

Q38 - Considering your responses to the truth and discrimination OMERACT filter above, does TEFS meet the requirements for the outcome measure representing the Pain over a Specified Time Domain in the core outcome set for lateral elbow tendinopathy.

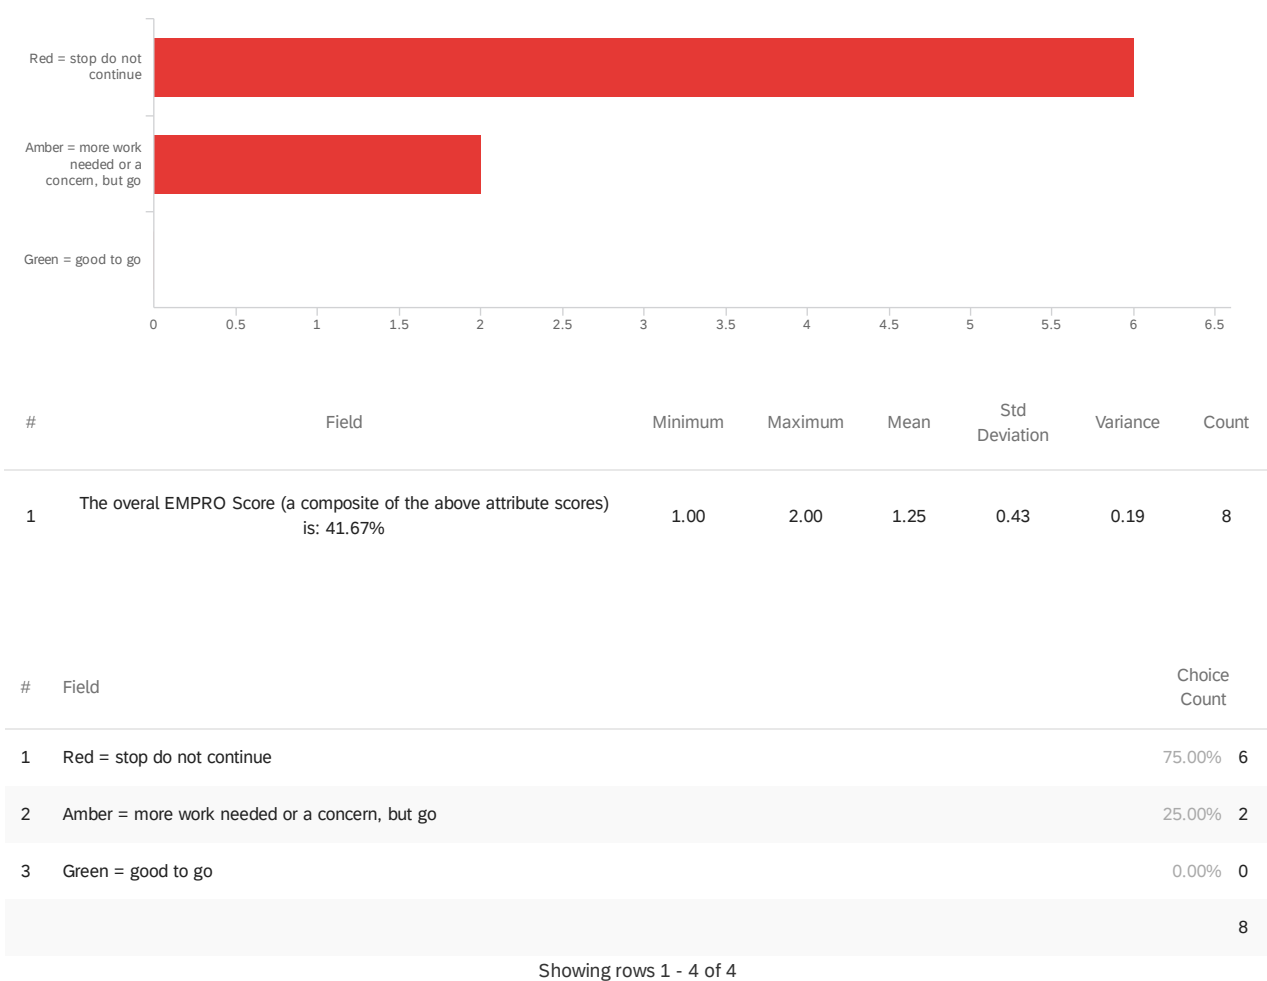

Q32 - The PRTEE meets the truth OMERACT filter requirements for the outcome

measure representing the Function Domain in the core outcome set for lateral elbow tendinopathy.

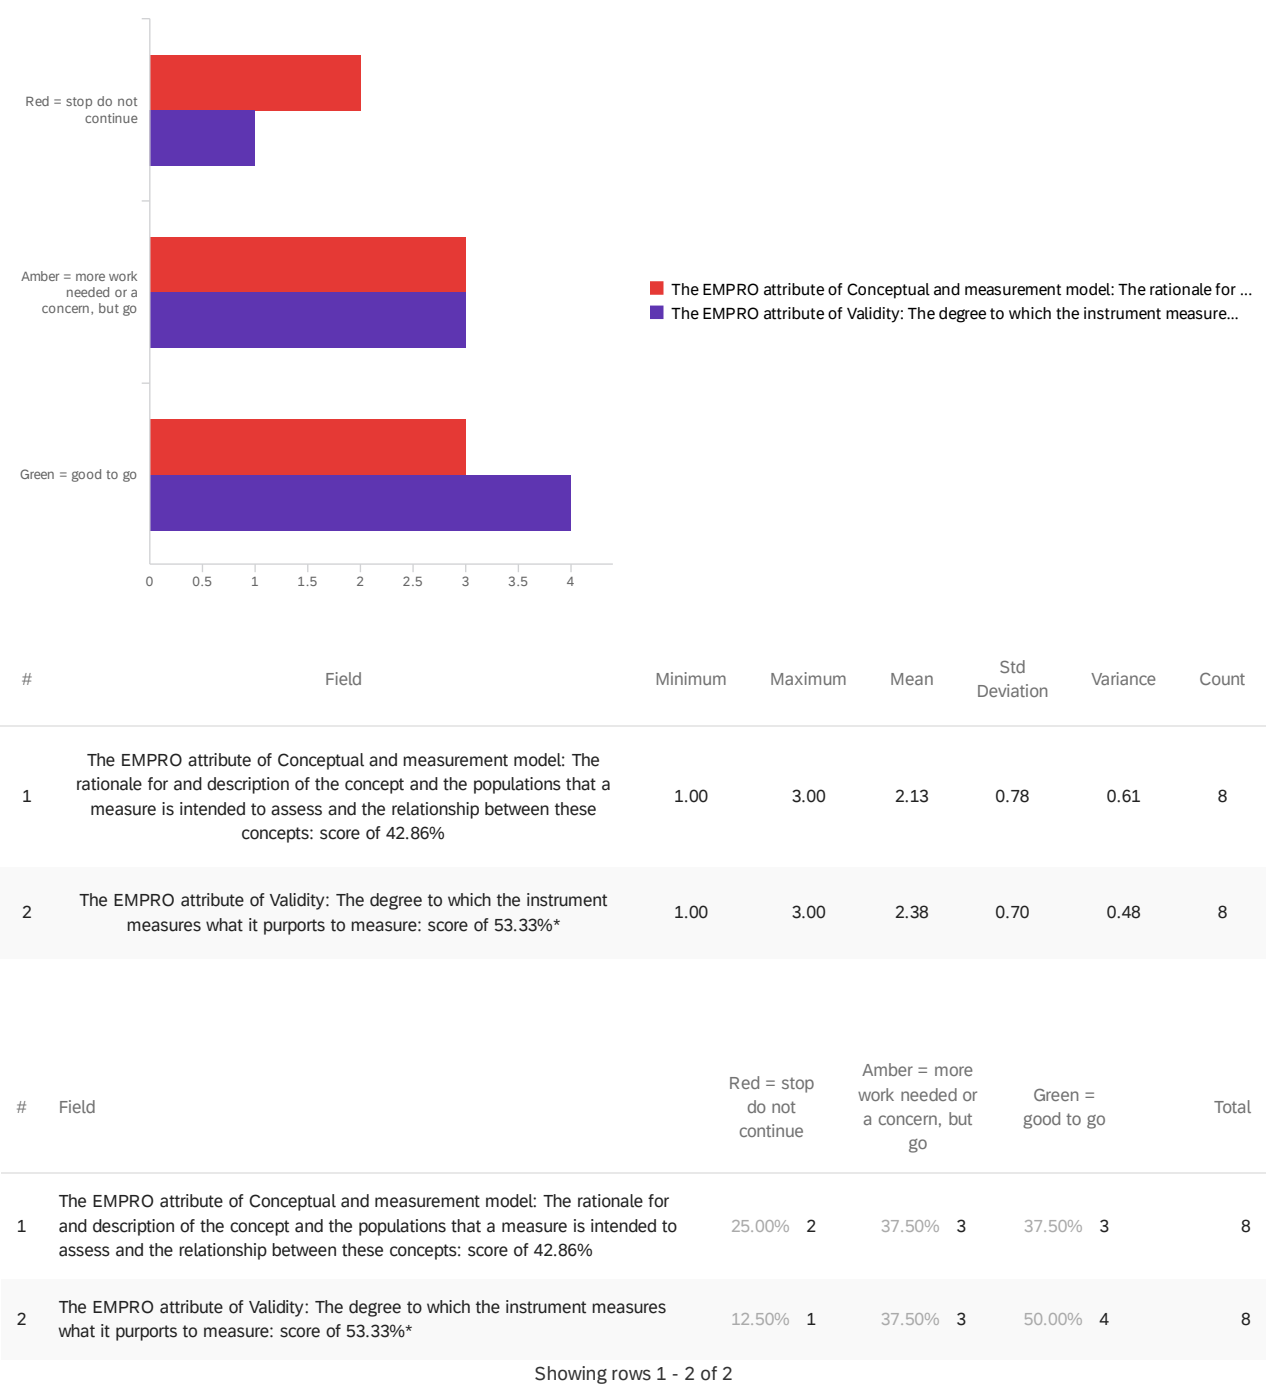

Q33 - PRTEE meets the discrimination OMERACT filter requirements for the outcome

measure representing the Function Domain in the core outcome set for lateral elbow tendinopathy.

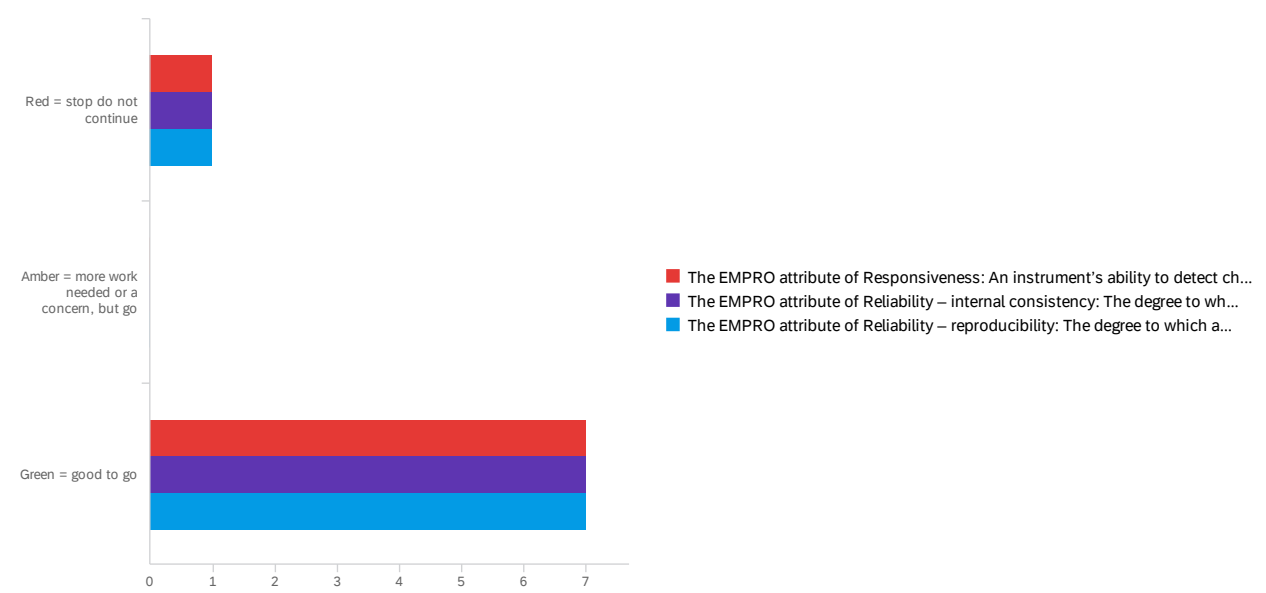

| # | Field                                                                                                                                   | Minimum | Maximum | Mean | Std Deviation | Variance | Count |
|---|-----------------------------------------------------------------------------------------------------------------------------------------|---------|---------|------|---------------|----------|-------|
| 1 | The EMPRO attribute of Responsiveness: An instrument's ability to detect change over time: score of 77.78%                              | 1.00    | 3.00    | 2.75 | 0.66          | 0.44     | 8     |
| 2 | The EMPRO attribute of Reliability – internal consistency: The degree to which an instrument is free from random error: score of 66.67% | 1.00    | 3.00    | 2.75 | 0.66          | 0.44     | 8     |
| 3 | The EMPRO attribute of Reliability – reproducibility: The degree to which an instrument is free from random error: score of 66.67%      | 1.00    | 3.00    | 2.75 | 0.66          | 0.44     | 8     |

| # | Field                                                                                                                                   | Red = stop do not continue |   | Amber = more work needed or a concern, but go |   | Green = good to go |   | Total |
|---|-----------------------------------------------------------------------------------------------------------------------------------------|----------------------------|---|-----------------------------------------------|---|--------------------|---|-------|
| 1 | The EMPRO attribute of Responsiveness: An instrument's ability to detect change over time: score of 77.78%                              | 12.50%                     | 1 | 0.00%                                         | 0 | 87.50%             | 7 | 8     |
| 2 | The EMPRO attribute of Reliability – internal consistency: The degree to which an instrument is free from random error: score of 66.67% | 12.50%                     | 1 | 0.00%                                         | 0 | 87.50%             | 7 | 8     |

| # | Field                                                                                                                              | Red = stop do<br>not continue | Amber = more work<br>needed or a concern, but<br>go | Green =<br>good to go | Total |
|---|------------------------------------------------------------------------------------------------------------------------------------|-------------------------------|-----------------------------------------------------|-----------------------|-------|
| 3 | The EMPRO attribute of Reliability – reproducibility: The degree to which an instrument is free from random error: score of 66.67% | 12.50% 1                      | 0.00% 0                                             | 87.50% 7              | 8     |

Showing rows 1 - 3 of 3



Q34 - Considering your responses to the truth and discrimination OMERACT filter above

and the fact that the EMPRO scores will overinflate the validity and overall score due to

the lack of validity data for the function subscale, does PRTEE meets the requirements for

the outcome measure representing the Function Domain in the core outcome set for

lateral elbow tendinopathy.

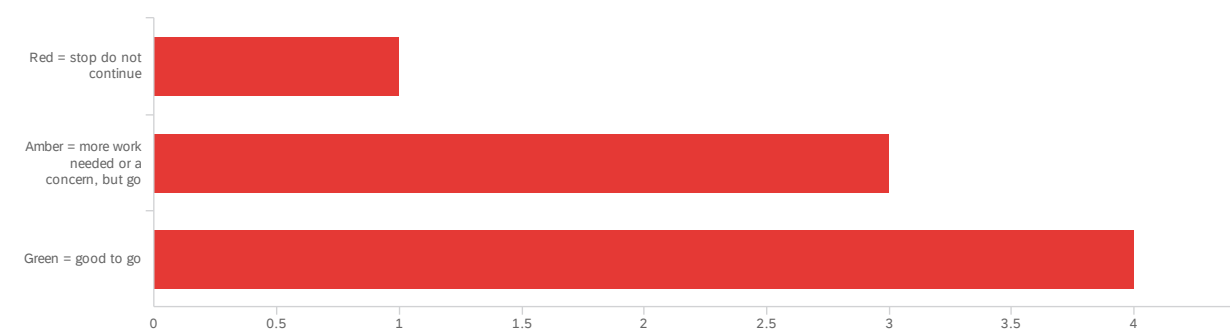

| # | Field                                                                           | Minimum | Maximum | Mean | Std Deviation | Variance | Count |
|---|---------------------------------------------------------------------------------|---------|---------|------|---------------|----------|-------|
| 1 | The overall EMPRO Score (a composite of the above attribute scores) is: 57.02%* | 1.00    | 3.00    | 2.38 | 0.70          | 0.48     | 8     |

| # | Field                                         | Choice Count |
|---|-----------------------------------------------|--------------|
| 1 | Red = stop do not continue                    | 12.50% 1     |
| 2 | Amber = more work needed or a concern, but go | 37.50% 3     |
| 3 | Green = good to go                            | 50.00% 4     |
|   |                                               | 8            |

Showing rows 1 - 4 of 4

Q40 - The MGS meets the truth OMERACT filter requirements for the outcome measure

representing the Physical Function Capacity Domain in the core outcome set for lateral elbow tendinopathy.

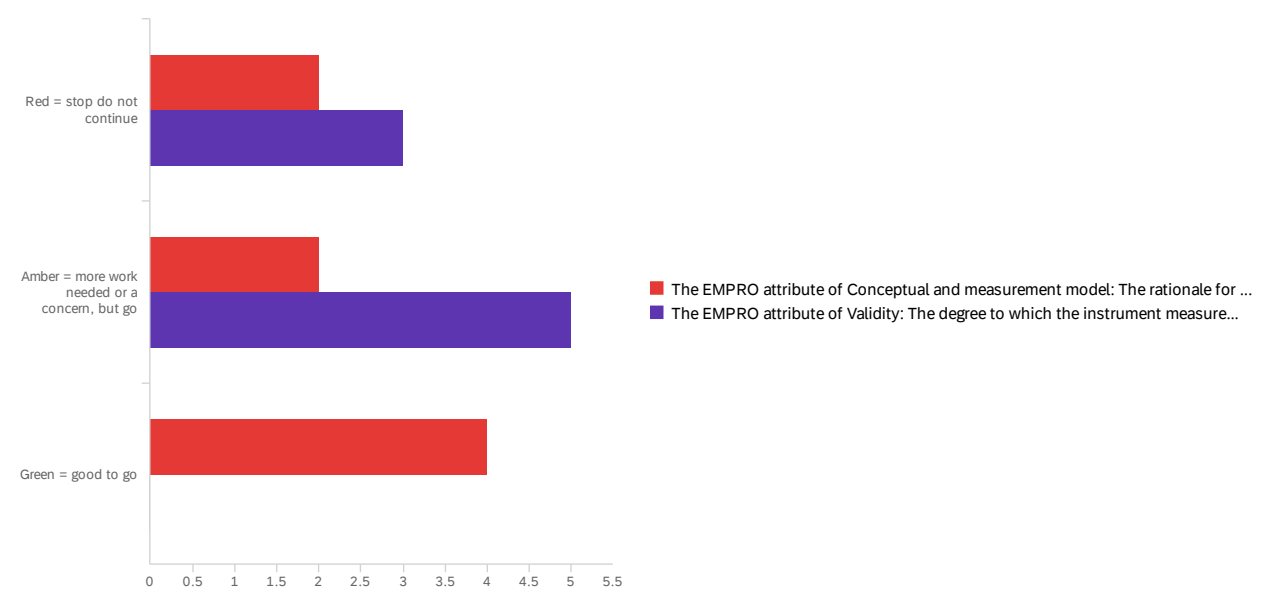

| # | Field                                                                                                                                                                                                                           | Minimum | Maximum | Mean | Std Deviation | Variance | Count |
|---|---------------------------------------------------------------------------------------------------------------------------------------------------------------------------------------------------------------------------------|---------|---------|------|---------------|----------|-------|
| 1 | The EMPRO attribute of Conceptual and measurement model: The rationale for and description of the concept and the populations that a measure is intended to assess and the relationship between these concepts: score of 47.62% | 1.00    | 3.00    | 2.25 | 0.83          | 0.69     | 8     |
| 2 | The EMPRO attribute of Validity: The degree to which the instrument measures what it purports to measure: score of 0%                                                                                                           | 1.00    | 2.00    | 1.63 | 0.48          | 0.23     | 8     |

| # | Field                                                                                                                                                                                                                           | Red = stop do not continue |   | Amber = more work needed or a concern, but go |   | Green = good to go |   | Total |
|---|---------------------------------------------------------------------------------------------------------------------------------------------------------------------------------------------------------------------------------|----------------------------|---|-----------------------------------------------|---|--------------------|---|-------|
| 1 | The EMPRO attribute of Conceptual and measurement model: The rationale for and description of the concept and the populations that a measure is intended to assess and the relationship between these concepts: score of 47.62% | 25.00%                     | 2 | 25.00%                                        | 2 | 50.00%             | 4 | 8     |
| 2 | The EMPRO attribute of Validity: The degree to which the instrument measures what it purports to measure: score of 0%                                                                                                           | 37.50%                     | 3 | 62.50%                                        | 5 | 0.00%              | 0 | 8     |

Showing rows 1 - 2 of 2

Q41 - MGS meets the discrimination OMERACT filter requirements for the outcome

measure representing the Physical Function Capacity Domain in the core outcome set for lateral elbow tendinopathy.

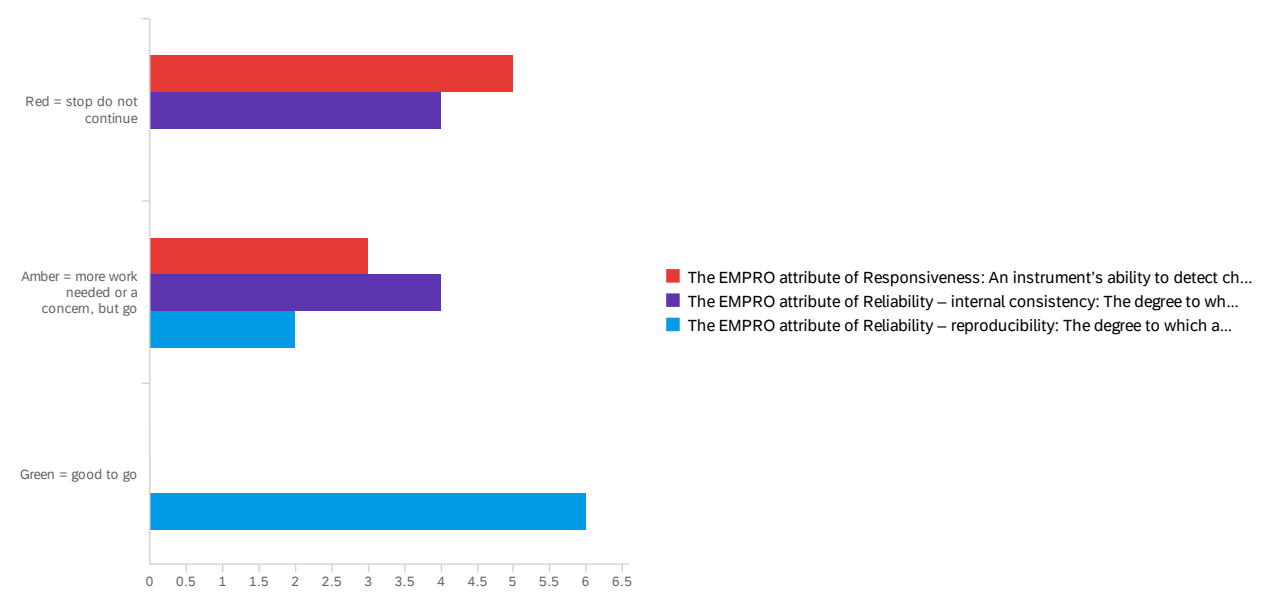

| # | Field                                                                                                                               | Minimum | Maximum | Mean | Std Deviation | Variance | Count |
|---|-------------------------------------------------------------------------------------------------------------------------------------|---------|---------|------|---------------|----------|-------|
| 1 | The EMPRO attribute of Responsiveness: An instrument's ability to detect change over time: score of 22.22%                          | 1.00    | 2.00    | 1.38 | 0.48          | 0.23     | 8     |
| 2 | The EMPRO attribute of Reliability – internal consistency: The degree to which an instrument is free from random error: score of 0% | 1.00    | 2.00    | 1.50 | 0.50          | 0.25     | 8     |
| 3 | The EMPRO attribute of Reliability – reproducibility: The degree to which an instrument is free from random error: score of 75%     | 2.00    | 3.00    | 2.75 | 0.43          | 0.19     | 8     |

| # | Field                                                                                                                               | Red = stop do not continue |   | Amber = more work needed or a concern, but go |   | Green = good to go |   | Total |
|---|-------------------------------------------------------------------------------------------------------------------------------------|----------------------------|---|-----------------------------------------------|---|--------------------|---|-------|
| 1 | The EMPRO attribute of Responsiveness: An instrument's ability to detect change over time: score of 22.22%                          | 62.50%                     | 5 | 37.50%                                        | 3 | 0.00%              | 0 | 8     |
| 2 | The EMPRO attribute of Reliability – internal consistency: The degree to which an instrument is free from random error: score of 0% | 50.00%                     | 4 | 50.00%                                        | 4 | 0.00%              | 0 | 8     |

| # | Field                                                                                                                           | Red = stop do<br>not continue | Amber = more work<br>needed or a concern, but<br>go | Green =<br>good to go | Total |
|---|---------------------------------------------------------------------------------------------------------------------------------|-------------------------------|-----------------------------------------------------|-----------------------|-------|
| 3 | The EMPRO attribute of Reliability – reproducibility: The degree to which an instrument is free from random error: score of 75% | 0.00% 0                       | 25.00% 2                                            | 75.00% 6              | 8     |

Showing rows 1 - 3 of 3

Q42 - Considering your responses to the truth and discrimination OMERACT filter above and the fact that the EMPRO scores will overinflate the validity and overall score due to the lack of validity data for the function subscale, does MGS meets the requirements for the outcome measure representing the Physical Function Capacity Domain in the core outcome set for lateral elbow tendinopathy.

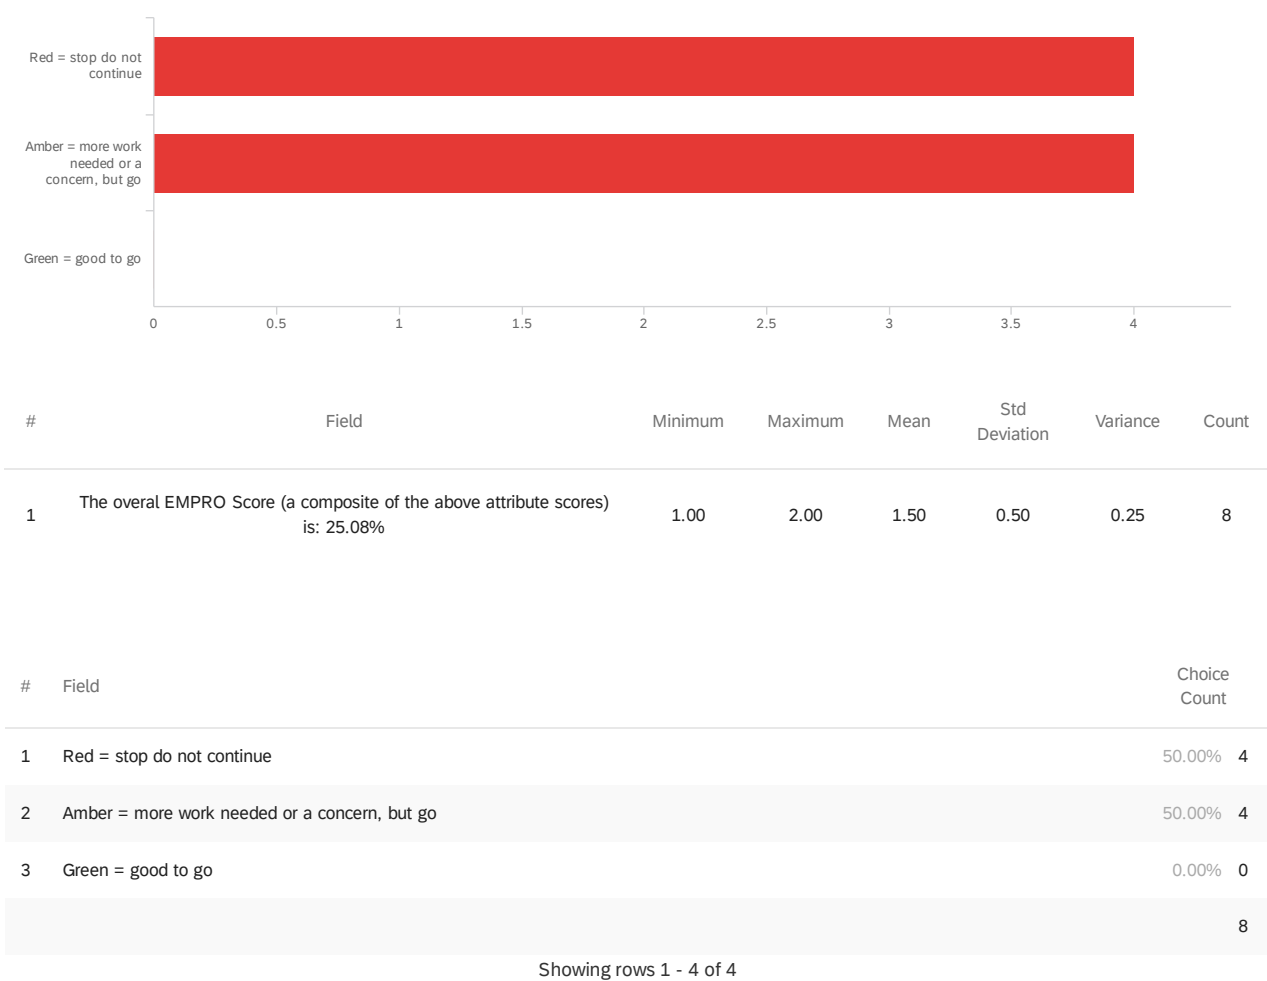

Q44 - The PFG meets the truth OMERACT filter requirements for the outcome measure

representing the Physical Function Capacity Domain in the core outcome set for lateral elbow tendinopathy.

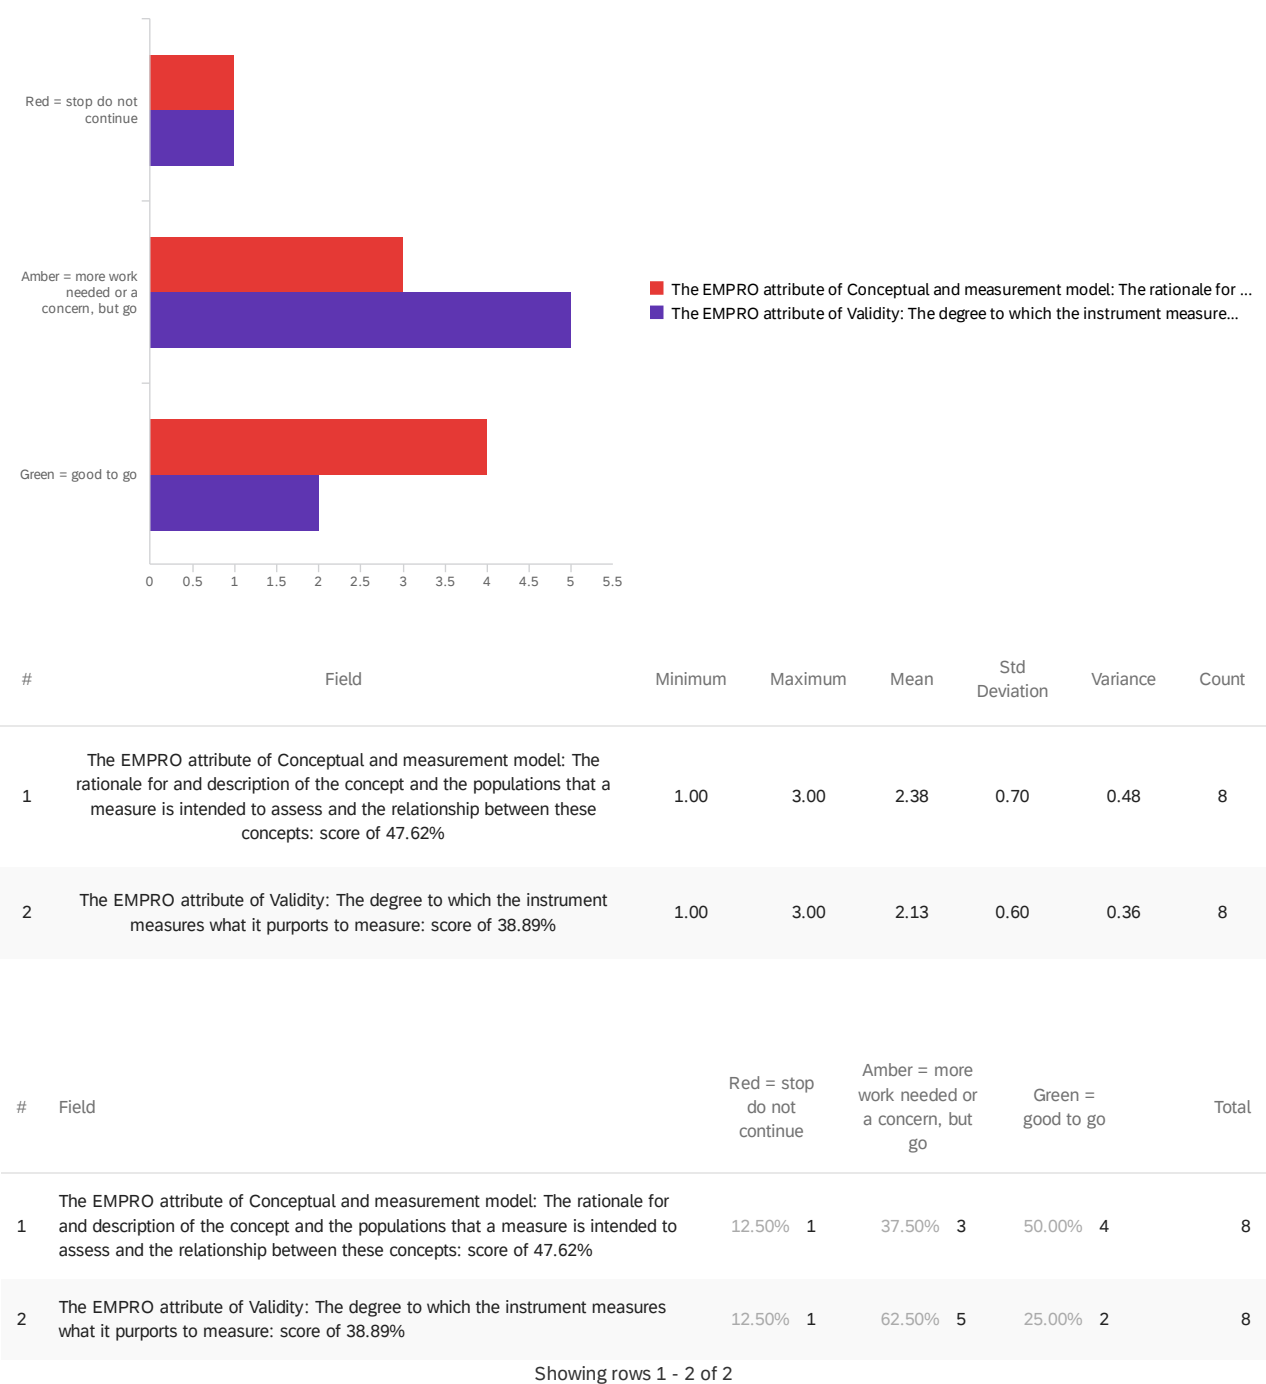

Q45 - PFG meets the discrimination OMERACT filter requirements for the outcome

measure representing the Physical Function Capacity Domain in the core outcome set for lateral elbow tendinopathy.

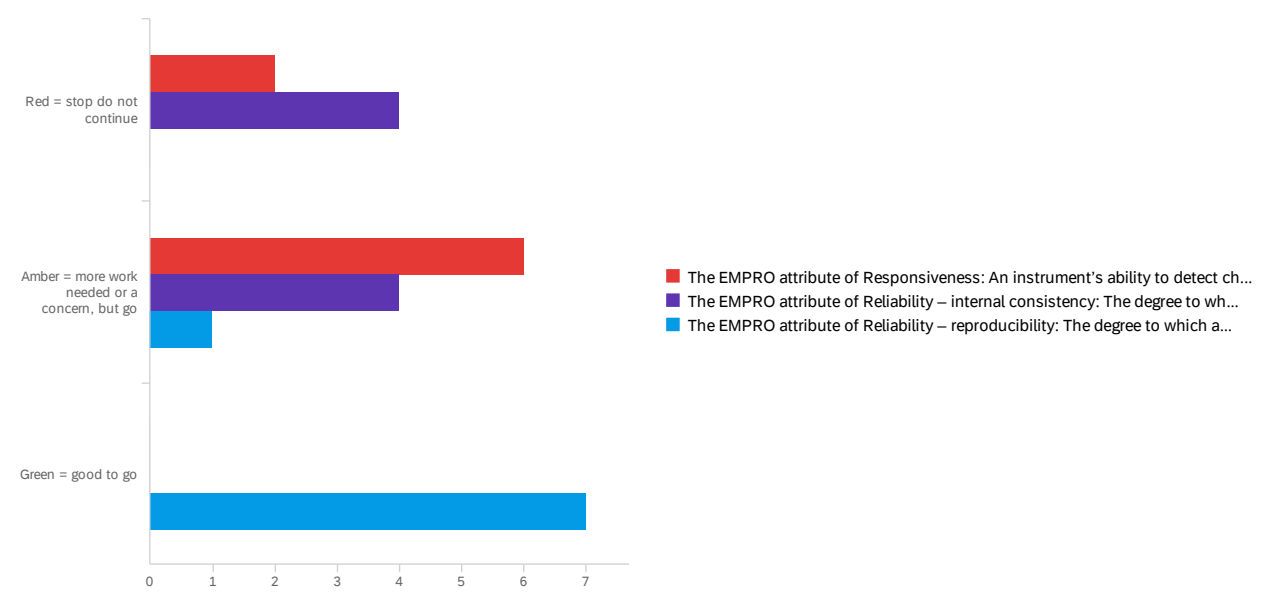

| # | Field                                                                                                                               | Minimum | Maximum | Mean | Std Deviation | Variance | Count |
|---|-------------------------------------------------------------------------------------------------------------------------------------|---------|---------|------|---------------|----------|-------|
| 1 | The EMPRO attribute of Responsiveness: An instrument's ability to detect change over time: score of 22.22%                          | 1.00    | 2.00    | 1.75 | 0.43          | 0.19     | 8     |
| 2 | The EMPRO attribute of Reliability – internal consistency: The degree to which an instrument is free from random error: score of 0% | 1.00    | 2.00    | 1.50 | 0.50          | 0.25     | 8     |
| 3 | The EMPRO attribute of Reliability – reproducibility: The degree to which an instrument is free from random error: score of 75%     | 2.00    | 3.00    | 2.88 | 0.33          | 0.11     | 8     |

| # | Field                                                                                                                               | Red = stop do not continue |   | Amber = more work needed or a concern, but go |   | Green = good to go |   | Total |
|---|-------------------------------------------------------------------------------------------------------------------------------------|----------------------------|---|-----------------------------------------------|---|--------------------|---|-------|
| 1 | The EMPRO attribute of Responsiveness: An instrument's ability to detect change over time: score of 22.22%                          | 25.00%                     | 2 | 75.00%                                        | 6 | 0.00%              | 0 | 8     |
| 2 | The EMPRO attribute of Reliability – internal consistency: The degree to which an instrument is free from random error: score of 0% | 50.00%                     | 4 | 50.00%                                        | 4 | 0.00%              | 0 | 8     |

| # | Field                                                                                                                           | Red = stop do<br>not continue | Amber = more work<br>needed or a concern, but<br>go | Green =<br>good to go | Total |
|---|---------------------------------------------------------------------------------------------------------------------------------|-------------------------------|-----------------------------------------------------|-----------------------|-------|
| 3 | The EMPRO attribute of Reliability – reproducibility: The degree to which an instrument is free from random error: score of 75% | 0.00% 0                       | 12.50% 1                                            | 87.50% 7              | 8     |

Showing rows 1 - 3 of 3



Q46 - Considering your responses to the truth and discrimination OMERACT filter above

and the fact that the EMPRO scores will overinflate the validity and overall score due to

the lack of validity data for the function subscale, does PFG meets the requirements for

the outcome measure representing the Physical Function Capacity Domain in the core

outcome set for lateral elbow tendinopathy.

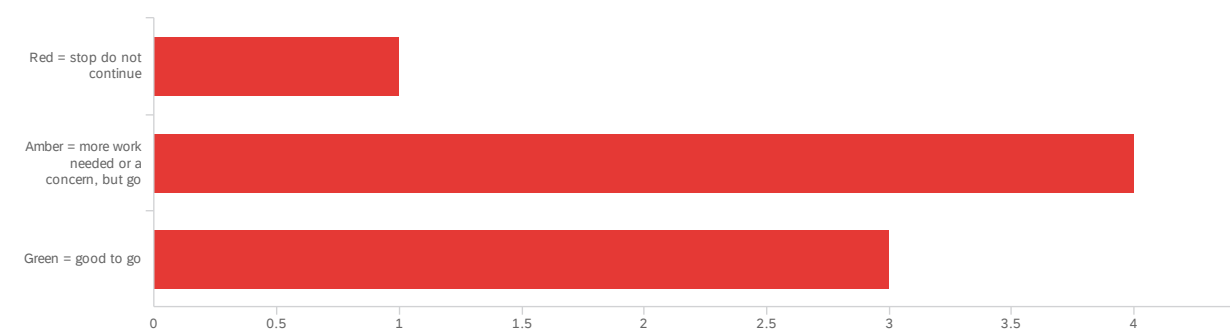

| # | Field                                                                             | Minimum | Maximum | Mean | Std Deviation | Variance | Count |
|---|-----------------------------------------------------------------------------------|---------|---------|------|---------------|----------|-------|
| 1 | The overall EMPRO Score (a composite of the above attribute scores)<br>is: 32.86% | 1.00    | 3.00    | 2.25 | 0.66          | 0.44     | 8     |

| # | Field                                         | Choice Count |
|---|-----------------------------------------------|--------------|
| 1 | Red = stop do not continue                    | 12.50% 1     |
| 2 | Amber = more work needed or a concern, but go | 50.00% 4     |
| 3 | Green = good to go                            | 37.50% 3     |
|   |                                               | 8            |

Showing rows 1 - 4 of 4

End of Report
